1 **Ultrasensitive detection of *Bacillus anthracis* by real time PCR targeting a**  
2 **polymorphism in multi-copy 16S rRNA genes and their transcripts**

3

4 **Peter Braun<sup>1</sup>, Martin Duy-Thanh Nguyen<sup>1</sup>, Mathias C. Walter<sup>1</sup> and Gregor Grass<sup>1\*</sup>**

5 <sup>1</sup>Bundeswehr Institute of Microbiology (IMB), Munich, Germany;  
6 martin2nguyen@bundeswehr.org (MDTN); peter3braun@bundeswehr.org (PB);  
7 mathias1walter@bundeswehr.org (MW); gregorgrass@bundeswehr.org (GG)

8 \*Correspondence: gregorgrass@bundeswehr.org; Tel.: +49-992692-3981

9

10 **Abstract:** The anthrax pathogen *Bacillus anthracis* poses a significant threat to human  
11 health. Identification of *B. anthracis* is challenging because of the bacterium's close genetic  
12 relationship to other *Bacillus cereus* group species. Thus, molecular detection is founded on  
13 species-specific PCR targeting single-copy genes. Here, we validated a previously  
14 recognized multi-copy target, a species-specific SNP present in 2-5 copies in every *B.*  
15 *anthracis* genome analyzed. For this, a hydrolysis probe-based real time PCR assay was  
16 developed and rigorously tested. The assay was specific as only *B. anthracis* DNA yielded  
17 positive results, was linear over 9 log<sub>10</sub> units and was sensitive with a limit of detection (LoD)  
18 of 2.9 copies/reaction. Though not exhibiting a lower LoD than established single copy PCR  
19 targets (*dhp61* or *PL3*), the higher copy number of the *B. anthracis*-specific 16S rRNA gene  
20 allele afforded ≤2 unit lower threshold (Ct) values. To push the detection limit even further,  
21 the assay was adapted for reverse transcription PCR on 16S rRNA transcripts. This RT-PCR  
22 assay was also linear over 9 log<sub>10</sub> units and was sensitive with a LoD of 6.3 copies/reaction.

23 In a dilution-series of experiments, the 16S RT-PCR assay achieved a thousand-fold higher  
24 sensitivity than the DNA-targeting assays. For molecular diagnostics, we recommend a real  
25 time RT-PCR assay variant in which both DNA and RNA serve as templates (thus, no  
26 requirement for DNase treatment). This will at least provide results equaling the DNA-based  
27 implementation if no RNA is present but will be superior even at the lowest residual rRNA  
28 concentrations.

29

30

31 **Keywords:** Anthrax; *Bacillus anthracis*; 16S rRNA; detection; identification; real time PCR;

32 RT-PCR

33

## 34 1. Introduction

35 Within the genus *Bacillus* the notorious anthrax pathogen *Bacillus anthracis* poses the  
36 greatest risk for humans, mammal livestock and wildlife. [1]. Other *Bacillus* spp. such as *B.*  
37 *cereus* or *B. thuringiensis* may also have pathogenic traits related to food-poisoning,  
38 infections in immunocompromised persons or production of insecticides [2]. Yet only  
39 *B. anthracis* (and a few *B. anthracis*-like bacilli) features a unique suite of pathogenicity  
40 factors rendering the endospore-forming bacterium a first-rate bioterror agent. These factors  
41 are encoded on two plasmids called pXO1 and pXO2, respectively. Plasmid pXO1 encodes  
42 the anthrax toxin genes producing the lethal toxin (gene products of *pagA* and *lef*) and  
43 edema toxin (gene products of *pagA* and *cya*) [1]. These toxins damage host cells on various  
44 levels [3]. Plasmid pXO2 harbors the capsule genes endowing the pathogen with a poly-  
45 glutamyl capsule which helps evading host immune response [1, 4]. Phylogenetically, *B.*  
46 *anthracis* belongs to the very closely related *Bacillus cereus sensu lato* group. Besides the  
47 better-known species *B. cereus sensu stricto*, *B. anthracis* or *B. thuringiensis*, the group also  
48 comprises several other familiar species such as *B. weihenstephanensis*, *B. mycoides*, *B.*  
49 *cytotoxicus* and a variety of lesser-characterized members [5].

50 In the past, the high degree of genetic relatedness to several *B. cereus s. l.* strains has  
51 rendered molecular diagnostics of *B. anthracis* challenging (e.g., by polymerase chain  
52 reaction assays, PCR). One would think it should be straight forward to identify *B. anthracis*  
53 by detecting genetic marker genes (typically *pagA*, *lef*, *cya*, *capB* or *capC*) [6-8] on one or  
54 both of its virulence plasmids. Identifying these genes, however, only verifies the presence of

55 these plasmids. This is relevant because several *B. cereus* s. *l.* isolates are documented to  
56 possess very similar virulence plasmids but not necessarily all of these belong to the species  
57 *B. anthracis*. Further, there are *B. anthracis* strains that lack one or both virulence plasmids.  
58 Species-specific molecular identification of *B. anthracis* is achieved by targeting a small  
59 number of validated chromosomal targets. These targets comprise sections of genes such as  
60 *dhp61* (*BA\_5345*; [9]), *PL3* (*BA\_5358*; [6]) or mutations characterized as single nucleotide  
61 polymorphisms (SNPs) e.g., in the *rpoB* [7] or the *plcR* [10] gene, respectively. A  
62 comprehensive overview of suitable and less ideal specific markers for *B. anthracis* has been  
63 provided previously [11]. Notwithstanding, the advantage of assaying for pXO1 or pXO2  
64 markers over chromosomal ones is that the plasmid markers occur as multi-copy genes  
65 (since the virulence plasmids are present in more than one copy per cell) [12]. Large-scale  
66 genomic sequencing revealed that in *B. anthracis* plasmids pXO1 and pXO2 (with their  
67 respective PCR-marker genes) are present on average in 3.86 and 2.29 copies, respectively  
68 [13]. Conversely, no multi-copy chromosomal marker has been employed for *B. anthracis*  
69 detection thus far.

70 Likewise, ribosomal RNA (particularly 16S rRNA) has not yet been routinely used for  
71 identification and detection of *B. anthracis* even though rRNA molecules are generally the  
72 most abundant ribonucleic acid entities in cells constituting up to approximately 80% of total  
73 RNA [14]. In fact, copies of 16S rRNA transcripts per cell as constituents of ribosomes,  
74 number in many thousands e.g., in *E. coli* the number of ribosomes per cell ranges from  $8 \times$   
75  $10^3$  at a doubling time of 100 min to  $7.3 \times 10^4$  at a doubling time of 20 min [15]. Even in

76 stationary culture, a single *E. coli* bacterium contains about  $6.5 \times 10^3$  copies of ribosomes  
77 [16]. Phylogenetically closer to *B. anthracis* than *E. coli* is *Bacillus licheniformis*. For this  
78 bacillus the average number of ribosomes per cell was calculated at  $1.25 \times 10^4$ ,  $3.44 \times 10^4$ , or  
79  $9.2 \times 10^4$  in cultures growing at 37°C with generation times of 120, 60 and 35 min,  
80 respectively [17]. While these numbers are well in agreement, somewhat lower numbers of  $9$   
81  $\times 10^3$  ribosomes have been determined for exponentially growing cells of *Bacillus subtilis*  
82 [18]. While unexplored for *B. anthracis*, bacterial detection using rRNA genes and transcripts  
83 has been successfully harnessed to challenge previous limits of detection (LoD) for other  
84 pathogens [19-21].

85 In this study, we introduce a species-specific multi-copy chromosomal PCR marker of *B.*  
86 *anthracis*. This marker is represented by a unique SNP within a variable number of loci of the  
87 multi-copy 16S rRNA gene in this organism. Though the 16S rRNA gene sequences feature  
88 a very high degree of identity among the *B. cereus s.l.* group species [22], this SNP has  
89 previously been identified as unique and present in all publicly available *B. anthracis*  
90 genomic data [23-25]]. Since all 16S rRNA gene copies harboring the SNP have 100%  
91 sequence identity, this specific sequence variation represents a distinct 16S rRNA gene  
92 allele named 16S-BA-allele. For simplification, all other 16S rRNA gene alleles lacking the  
93 sequence variation were named 16S-BC-allele. The relative abundance of these 16S-BA-  
94 and -BC-alleles were recently quantified in 959 *B. anthracis* isolates [25]. Here we also  
95 harnessed this SNP to develop a *B. anthracis* specific reverse transcription (RT) real time  
96 PCR assay. This approach brings the multi-copy marker concept for *B. anthracis* up to a new

97 level owed to the excess numbers of ribosomes (and thus 16S rRNA moieties) in relation to  
98 chromosomes within a *B. anthracis* cell.

## 99 **2. Materials and Methods**

### 100 *2.1. Bacterial culture, inactivation and DNA samples for quality assessment.*

101 *B. anthracis* strains and other Bacilli were cultivated at 37°C on tryptic soy agar plates (TSA,  
102 Merck KGaA, Darmstadt, Germany). Bacteria comprising the negative panel (Supplementary  
103 Table S1) were grown on appropriate agar media (with 10% CO<sub>2</sub> atmosphere where  
104 required) at 37°C until colonies emerged. Risk group 3 (RG-3) *B. anthracis* strains were  
105 cultivated in the biosafety level 3 (BSL-3) facilities at the Bundeswehr Institute of  
106 Microbiology (IMB) and then chemically inactivated before further use [26]. RG-2 strains of  
107 endospore formers were inactivated by resuspending a loop of colony material in aqueous  
108 peracetic acid solution (4% Terralin PAA, Schülke & Mayr GmbH, Norderstedt, Germany)  
109 [26]. All other bacterial cultures were inactivated by 70% (v/v) ethanol. Ring trial *B. anthracis*  
110 DNA samples published in [27] were obtained from Instant (Düsseldorf, Germany).

111

### 112 *2.2. Isolation of DNA, RNA and nucleic acid quantification.*

113 Bacterial DNA and RNA was isolated using MasterPure™ Gram Positive DNA Purification kit  
114 (Lucigen, Middleton, WI, USA). For RNA (+DNA) isolation, RNase treatment was omitted.  
115 DNA and RNA concentrations were quantified using the Qubit dsDNA HS Assay or RNA HS  
116 Assay kits (ThermoFisher Scientific, Darmstadt, Germany) according to the manufacturers'

117 protocols. DNA and RNA (+DNA) preparations were stored at -20°C and -80°C, respectively,  
118 until further use.

### 119 2.3. Design and *in silico* bioinformatic analysis of primer and probe DNA sequences.

120 All relevant DNA sequence data for oligonucleotide design were retrieved from public  
121 databases (NCBI). Primer and probe DNA oligonucleotides [25] were designed with  
122 Geneious Prime (Biomatters, USA). *In silico* specificity analysis was performed by probing  
123 each primer and probe nucleotide sequences against the NCBI nt databases using BLASTN  
124 for short input sequences (Primer BLAST) [28]. The two amplification oligonucleotide primers  
125 target a consensus region within the 16S rRNA genes on the chromosome of *B. cereus s.l.*  
126 species (Table 1) including *B. anthracis*. The two oligonucleotide probes (Table 1) feature the  
127 centrally located discriminatory SNP (pos. 1110 in *B. anthracis* strain Ames Ancestor,  
128 NC\_007530) [23, 24]. These probes thus either match the allele unique for *B. anthracis*  
129 (named 16S-BA-allele; with an adenine, A at the SNP position) or the general 16S-BC-allele  
130 (guanine, G at the SNP position), respectively (the two alleles are depicted in Supplementary  
131 Figure S1). Due to placement and length restrictions related to another non-discriminatory  
132 SNP (pos. 1119) each probe was amended with locked nucleic acids (LNA). LNA are  
133 modified nucleic acids in which the sugar is conformationally locked. This rigidity causes  
134 exceptional hybridization affinity through stable duplexes with DNA and RNA [29] eventually  
135 improving mismatch discrimination in SNP genotyping studies. LNA probes as well as  
136 primers were purchased from TIB MolBiol (Berlin, Germany).

138

139 Table 1: primers and probes.

| Oligonucleotide       | Sequence (5'-3')                          |
|-----------------------|-------------------------------------------|
| 16S SNP F             | CGAGCGCAACCCTTGA                          |
| 16S SNP R             | CAGTCACCTTAGAGTGCCC                       |
| 16S SNP BA probe      | 6FAM-<br>CTT+AGTT+A+C+C+AT+CATT--<br>BHQ1 |
| 16S SNP BC probe      | HEX-CTT+AGTT+G+C+C+ATCATT-<br>-BHQ1       |
| Dark 16S SNP BC probe | CTT+AGTT+G+C+C+ATCATT-C3-<br>spacer*      |

140 Locked nucleic acids are designated by prepositioned (+); 6FAM - 6-Fluorescein  
141 phosphoramidite; HEX - Hexachloro-fluorescein; BHQ1 - Black Hole Quencher-1. \*blocked  
142 with a C3-spacer in 3'-position.

143

#### 144 2.4. Real-time and reverse transcription PCR conditions

145 All (pseudo) duplex real-time PCR amplifications were performed in reaction mixtures of a  
146 final volume of 20 µl containing 2 µL LightCycler® FastStart DNA Master HybProbe mix  
147 (Roche Diagnostics, Mannheim, Germany), 5 mM MgCl<sub>2</sub>, 0.5 µM of each primer, 0.25 µM of  
148 16S SNP BA probe, 0.75 µM of (dark) 16S SNP BC probe, and various quantities of template



149 DNA template. All reactions were performed on a LightCycler 480 real-time PCR system  
150 fitted with color compensation (Roche Diagnostics, Mannheim, Germany). The optimized  
151 amplification conditions were: 95°C for 10 min, and then 45 consecutive cycles of first 15 s at  
152 95°C and then 20 s at 62°C, followed by 20 s at 72°C.

153 Reverse transcription PCR reaction mixtures contained 7.4 µl LightCycler® 480 RNA Master  
154 Hydrolysis Probes mix, 1.3 µl Activator, 1 µl Enhancer (Roche Diagnostics, Mannheim,  
155 Germany), 0.5 µM of each primer, 0.25 µM of 16S SNP BA probe, 0.75 µM of (Dark) 16S  
156 SNP BC probe, a variable volume of RNA and/or DNA template. Finally nuclease-free water  
157 (Qiagen, Hilden, Germany) was added to a final volume of 20 µl. Using the LightCycler 480  
158 real-time PCR system (Roche Diagnostics, Mannheim, Germany) reverse transcription was  
159 performed at 63°C for 3 min followed by an activation step at 95 °C for 30 s and 45 cycles of  
160 95 °C for 15 s, 62 °C for 20 s and 72 °C for 1 s.

161 A fluorescent signal 10-fold higher than the standard deviation of the mean baseline  
162 emission was counted a positive detection. Samples were tested in triplicate (unless noted  
163 otherwise) and data recorded as Cycle thresholds (Ct) with Ct defined as the PCR cycle at  
164 which the fluorescent intensity raised above the threshold [30].

165

#### 166 *2.5. Droplet digital PCR (ddPCR) and reverse transcription (RT) ddPCR*

167 All DNA and RNA templates used for real-time and reverse transcription PCR were  
168 quantified by ddPCR and RT ddPCR, respectively. A 20 µl ddPCR reaction mixture consisted

169 of 10  $\mu$ l ddPCR Supermix for Probes (Bio-Rad Laboratories, Munich, Germany), 0.9  $\mu$ M of  
170 each primer, 0.15  $\mu$ M of each probe and 5  $\mu$ l of template DNA. RT-ddPCR reaction mixtures  
171 comprised of 5  $\mu$ l One-Step RT-ddPCR Advanced Supermix for Probes (Bio-Rad, Munich,  
172 Germany), 2  $\mu$ l of Reverse Transcriptase (Bio-Rad, Munich, Germany; final concentration 20  
173 U/ $\mu$ l), 0.6  $\mu$ l of DTT (Bio-Rad, Munich, Germany; final concentration 10 nM), , 0.9  $\mu$ M of  
174 each primer, 0.15  $\mu$ M of each probe and 5  $\mu$ l of template RNA. Droplets were generated  
175 using a QX200 ddPCR droplet generator (Bio-Rad, Munich, Germany). PCR amplification for  
176 both assays was performed on the Mastercycler Gradient (Eppendorf, Hamburg, Germany)  
177 with the following conditions:

178 Initial reverse transcription was carried at 48°C for 60 min (only for RT-ddPCR). Enzyme  
179 activation at 95°C for 10 min was followed by 40 cycles of a denaturation at 94°C for 30 s  
180 and annealing/extension at 58°C for 1 min. Before the samples were cooled to 4°C a final  
181 enzyme inactivation was carried out at 98°C for 10 min. Cooling and heating ramp rate was  
182 set to 2°C/s for all steps. After PCR runs, droplets were analyzed using the QX100 Droplet  
183 Reader (Bio-Rad, Munich, Germany) and absolute target concentrations of each sample  
184 were calculated using QuantaSoft Pro Software (Bio-Rad, Munich, Germany).

185

186

187

188 2.6. Generation of PCR positive controls from reference plasmids harboring 16S-BA- or BC-  
189 allele fragments.

190 Though we generally used genomic DNA from *B. cereus* or *B. anthracis*, respectively, for  
191 PCR testing and validation, generic positive control reference plasmids for either allele, the  
192 *B. anthracis*-specific 16S-BA-allele or the *B. cereus*-specific 16S-BC-allele were constructed.  
193 For this, a PCR-amplicon was generated from *B. anthracis* Ames DNA with primers 16S SNP  
194 F and 16S SNP R using Platinum™ Taq DNA Polymerase High Fidelity (ThermoFisher  
195 Scientific, Darmstadt, Germany). This DNA comprises a mixture of both alleles in a ratio of 4  
196 to 7 [25]. The PCR-amplicon was analyzed on agarose gel electrophoresis, a band of the  
197 expected size (57 bp) cut from the gel and gel-purified using QIAquick Gel Extraction kit  
198 (QIAGEN, Hilden Germany). PCR products were ligated into pCR2.1 TOPO vector  
199 (ThermoFisher Scientific, Darmstadt, Germany) using TOPO TA Cloning kit (Thermo  
200 Scientific, Darmstadt, Germany) and transformed into One Shot TOP10 chemically  
201 competent cells (ThermoFisher Scientific, Darmstadt, Germany) according to the  
202 manufacturer's protocol. Several recombinant plasmids isolated from different clones were  
203 sequenced (Eurofins Genomics Germany, Ebersberg, Germany) in order to obtain plasmids  
204 harboring either the 16S-BA-allele or the 16S-BC-allele. From these plasmids, PCR products  
205 were generated using primers M13 F and M13 R, which contained the target region for the  
206 16S rRNA SNP-PCR with either the 16S-BA- or BC-allele. After purification with QIAquick  
207 PCR purification kit (QIAGEN, Hilden Germany) PCR products were quantified using digital  
208 PCR and diluted as required.

209

210 *2.7. Determination of the specificity (inclusivity/exclusivity) of the B. anthracis 16S rRNA*

211 *allele assay.*

212 PCR specificity for the 16S rRNA SNP assay was assessed by verifying amplification of DNA

213 containing or lacking respective markers. “Inclusivity” was evaluated by (exponential)

214 amplification above threshold levels obtained with template DNA comprising the markers’

215 sequences. Vice versa, “exclusivity” was confirmed by lack of amplification of genomic DNA

216 from *B. cereus s.l.* strains reported to lack the particular 16S-BA-allele, but also may harbour

217 the alternative 16S-BC-allele or include no-template negative controls (NTC). Positive PCR

218 results were further analysed via agarose gel electrophoresis demonstrating a single band

219 with a molecular weight corresponding to the predicted size of the 16S rRNA SNP-PCR

220 amplicon (note: this cannot differentiate between the two alternative SNP states in the 16S

221 rRNA gene alleles).

222

223 *2.8. Dynamic linear range, PCR efficiency and limit of detection.*

224 The dynamic linearity of the PCR assays were determined over a 9 log<sub>10</sub> concentration range

225 for DNA (real-time PCR) and RNA (RT-PCR) templates. Each dilution was assayed 6-fold,

226 and analysis for linearity and PCR-efficiency (E) was performed from the plot of the Ct's

227 versus the logarithm of the target concentrations [31]. The sensitivity of the PCR assay was

228 expressed as the limit of detection (LoD) of 16S rRNA SNP genome or transcript copies. LoD

229 was formally defined as the concentration permitting detection of the analyte at least 95% of  
230 the time. For this, DNA fragments comprising the 16S rRNA SNP were diluted to between 10  
231 and 0 copies per reaction, subjected to real-time PCR with 12 replicates for each dilution  
232 step. Probit analysis (plot of fitted model) was performed [32] using StatGraphics Centurion  
233 XVI.I (16.1.11; Statgraphics Technologies, The Plains, Virginia, USA) to determine the LoD  
234 by fitting template copies against the cumulative fractions of positive PCR observations and  
235 used for calculating the lower and upper 95% confidence limits. The LoD of the 16S rRNA  
236 SNP RT-PCR was determined likewise using samples with 0-15 rRNA copies per reaction  
237 (12 replicates for each dilution step).

238

### 239 **3. Results**

#### 240 *3.1. Set-up and optimization of a new 16S rRNA gene allele-specific PCR assay.*

241 The “16S SNP BA probe” for hybridization to the *B. anthracis* specific sequence variation in  
242 16S-BA-alleles in the *B. anthracis* genome was designed such as that the SNP position was  
243 located centrally. In order to increase fidelity of this probe, six locked nucleic acid (LNA)  
244 bases were introduced (Table 1). Likewise, the alternative “16S SNP BC probe” recognizing  
245 the non-*B. anthracis* specific 16S-BC-alleles of *B. anthracis* features five LNA positions  
246 (Table 1). The 16S SNP BA probe was verified *in silico* against the NCBI database to be  
247 highly specific for *B. anthracis*, only genomes of a few bacterial isolates exhibited identical  
248 sequences among these was e.g., a small number of *Sphingomonas* spp. Others, such as a

249 few genomes annotated as *Staphylococcus aureus* had the same one-base-pair mismatch at  
250 the SNP-position (relative to *B. anthracis*) and were thus identical to other *B. cereus s. l.*  
251 genomes, hybridizing perfectly against the alternative “16S SNP BC probe” (supplementary  
252 Figure S1).

253 Initially, the 16S SNP BC probe which deviates only by the one central SNP base from the  
254 16S SNP BA probe also carried a fluorescent dye/quencher pair. However, since this probe  
255 was found to be not entirely specific for recognizing 16S rRNA fragments of *B. cereus s. l.*  
256 members, we decided to additionally design this SNP-competing probe as a fluorescently  
257 “dark” probe in order to reduce costs of synthesis (Table 1). Thus, the 16S rRNA SNP-PCR  
258 may be considered a pseudo-duplex assay (see below for details). All PCR runs were  
259 performed with both probes, typically with the 6FAM-labeled 16S SNP BA probe and the dark  
260 16S SNP BC probe.

261 *In silico* analysis against the NCBI nt database confirmed that the PCR amplification primers  
262 16S SNP F and 16S SNP R (Table 1) were not species-specific for *B. anthracis*. Indeed,  
263 besides DNA from other members of the *B. cereus s. l.* group, these primers would also  
264 amplify genome-sequences of various other bacteria, such as *Paenibacillus* spp., or the  
265 reverse primer would bind to sequences of *Alkalihalobacillus clausii* or *Bacillus licheniformis*  
266 among others. This ambiguity is not surprising for primers hybridizing against 16S rRNA  
267 gene sequences. Conversely, the pivotal factor for the detection assay introduced here is  
268 that only the 16S SNP BA probe hybridizes without any mismatch against 16S-BA-allele in *B.*

269 *anthracis* (supplementary Fig. S1). Thus, the specificity of the PCR assay is uniquely and  
270 entirely governed by the LNA-enhanced 16S SNP BA probe.

271 The 16S rRNA SNP-PCR was robust for deviations from the optimum annealing temperature  
272 (62°C; supplementary Table S1). Also, primer (supplementary Table S2), probe  
273 (supplementary Table S3) and MgCl<sub>2</sub> (supplementary Table S4) concentrations and pipetting  
274 errors (supplementary Table S5) were tolerated quite well. Intra- and inter-assay  
275 (supplementary Table S6 and S7) variability was determined with positive, weakly positive  
276 and negative template DNA. The average PCR variations were at 0.0-1.1% (intra-assay) and  
277 1.1-1.2% (inter-assay), respectively (supplementary Table S6 and S7), indicating high  
278 precision of the PCR. Melt point analysis of the 16S-BA-allele PCR product vs. the 16S-BC-  
279 allele PCR product (supplementary Fig. S2) indicated specific amplification of each allele  
280 fragment.

281

282 *3.2. Competitive amplification - inhibition of the 16S-BA-allele fragment-PCR by excess of*  
283 *the alternative 16S-BC-allele.*

284 Though the new 16S rRNA SNP-PCR assay was tested very robust and precise, we were  
285 wondering to which degree the assay would be inhibited by large excesses of the alternative  
286 16S-BC-allele fragment featuring a single mismatch at the SNP located centrally in the  
287 hybridizing 16S-BA-allele specific PCR probe (supplementary Fig. S1). For testing this, we  
288 first evaluated which probe ratio (16S rRNA SNP BA vs. BC probe) would yield the lowest

289 residual fluorescence values (in the 6FAM-channel of the 16S-BA-allele-specific probe) when  
290 providing only 16S-BC-allele containing DNA as PCR template. In these tests, the  
291 concentration of the 16S-BA-allele specific probe was kept constant at 0.25  $\mu$ M. The  
292 resulting 6FAM-fluorescence values were very low compared to regular amplification  
293 (supplementary Table S8), signals were weakly linearly increasing and no Ct values were  
294 detected. The lowest fluorescence, barely above the negative control level, was recorded at  
295 a ratio of 0.25 / 0.75  $\mu$ M (16S rRNA SNP-BA probe /-BC probe). Thus, this ratio was used for  
296 all following tests.

297 Next, a constant 100 template copies of the 16S-BA-allele fragment per reaction were  
298 titrated against increasing copy numbers of the alternative 16S-BC-allele fragment.  
299 Supplementary Figure S3 and supplementary Table S9 show that an excess of 16S-BC-  
300 allele to BA-allele fragments of  $10^6$ ,  $10^5$ ,  $10^4$  or  $10^3$  to 1 (supplementary Table S9; assay #1-  
301 4) inhibits detection of the 16S-BA-allele fragment. This is because there was neither any  
302 *bone fide* sigmoidal PCR amplification, nor were there any fluorescence signals with values  
303 meaningfully above the 16S-BC-allele-only controls (assays #11 and #12). Starting with 7.5 x  
304  $10^4$  copies of competing 16S-BC-alleles (vs. 100 16S-BA-allele copies, i.e., 750:1; assay #5)  
305 both a regular Ct value was provided and fluorescence started to markedly increase above  
306 base level. At a ratio of 500 to 1 (16S-BC- to BA-alleles), *B. anthracis* detection became  
307 possible (assays #6 vs. #12; #7). Latest at a surplus of equal or less than 100:1 (assay #8)  
308 detection of 16S-BA-allele among BC-alleles was robustly possible. Thus, at the very least a  
309 single copy of 16S-BA-allele can be detected in the presence of 100 BC-alleles.



310

311 *3.3. Sensitivity and specificity of the 16S rRNA SNP-PCR assay.*

312 Similar to earlier work [33], we sought to harness the specificity of SNP-interrogation without  
313 assaying the alternative SNP state (i.e., the 16S-BC-allele here). Because detecting the 16S-  
314 BC-allele was not of interest for the assay at hand, the respective labelled 16S SNP BC  
315 probe was replaced by an unlabeled, fluorescently “dark” probe (i.e., a BA allele SNP-  
316 competitor probe; Table 1). In effect, primers would still amplify both alleles; however, the  
317 fluorescent probe for the 16S–BA-allele would be outcompeted by the dark probe on 16S-  
318 BC-allele targets and the fluorescent 16S rRNA BA SNP probe would only generate signals  
319 in the presense of cognate 16S-BA-allele sequences. Thus, this approach using a dark  
320 competing probe would diminish the inadvertent generation of unspecific fluorescence  
321 generated by mishybridization of 16S rRNA BA SNP probes to 16S-BC-allele sequences.

322 To formally validate the sensitivity of the 16S rRNA SNP-PCR assay, a panel of 14 different  
323 *B. anthracis* DNAs was employed. These *B. anthracis* strains represent all major branches A,  
324 B and C [34] including prominent sub-branches [35] of the global *B. anthracis* phylogeny  
325 (supplementary Table S10). All DNAs produced positive PCR results. Similarly, we tested a  
326 “specificity panel” of potentially cross-reacting organisms (supplementary Table S11). This  
327 panel included 13 DNAs of non-*anthracis* *B. cereus* s. l. strains. Also included were DNAs of  
328 common animal host organisms such as cattle, goat, sheep and human. Neither of these  
329 DNAs yielded any positive PCR results. Finally, DNAs of organisms relevant for differential  
330 diagnostics and other prominent microbial pathogens were also assayed by the new *B.*

331 *anthracis* specific 16S rRNA SNP-PCR (supplementary Table S12). Again, none of these  
332 DNAs resulted in false-positive PCR results. Of note, *Sphingomonas zeae* JM-791 [36]  
333 harboring 16S rRNA genes 100% identical in the region of the 16S SNP BA probe but  
334 differences in the primer binding sites, yielded negative PCR results. These results clearly  
335 indicated that the new PCR is both sensitive and specific for *B. anthracis*.

336 *3.4. Linear dynamic range, efficiency and limit of detection of the B. anthracis specific 16S*  
337 *rRNA SNP-PCR assay.*

338 The linear dynamic range of the new PCR was determined based on measurements of serial  
339 DNA dilutions using recombinant 16S-BA-allele fragments or genomic DNA of *B. anthracis*  
340 Ames, respectively, as templates (Figure 1). Linearity was observed over a range from  $10^1$  to  
341  $10^9$  copies per reaction for cloned template DNA (Figure 1A; supplementary Table S13). In  
342 nine out of nine PCR replicates, positive signals were obtained down to  $10^1$  copies per  
343 reaction. At  $10^0$ , two out of nine reactions were negative, thus defining the lower limit of the  
344 linear dynamic range. The coefficient of determination ( $R^2$ ) was calculated as  $>0.999$ . From  
345 the slope of the linear regression, the efficacy of the PCR was derived as 2.0 (which is  
346 100.1% of the theoretical optimum). Thus, the 16S rRNA SNP-PCR assay performed very  
347 well over a wide  $9 \log_{10}$  concentration range of template DNA.

348 The *B. anthracis* Ames genome harbors four copies of the 16S-BA-allele and seven copies of  
349 the BC-allele. Linear range parameters were very similar to that of cloned 16S-BA-allele  
350 DNA-fragment (Figure 1B; supplementary Table S13). Because of the upper concentration  
351 limit of our *B. anthracis* Ames DNA preparations, the highest value in the linear range was

352  $10^6$  genome copies. Thus, here the linear range covered target concentrations from  $10^0$  to  
353  $10^6$  copies per reaction. The coefficients of determination ( $R^2$ ) was determined as  $>0.999$  and  
354 the efficacy of the PCR as 1.99 (which is 98.7% of the theoretical optimum). This indicated  
355 that the 16S rRNA SNP PCR assay yielded very similar results in these experiments whether  
356 recombinant target DNA or authentic *B. anthracis* DNA was used as templates. Note though,  
357 a single *B. anthracis* Ames genome carries four copies of the 16S-BA-allele. This explains  
358 why all PCRs yielded positive signals with DNA template at  $10^0$  copies (genome equivalents),  
359 whereas PCRs using single copy recombinant template did not.

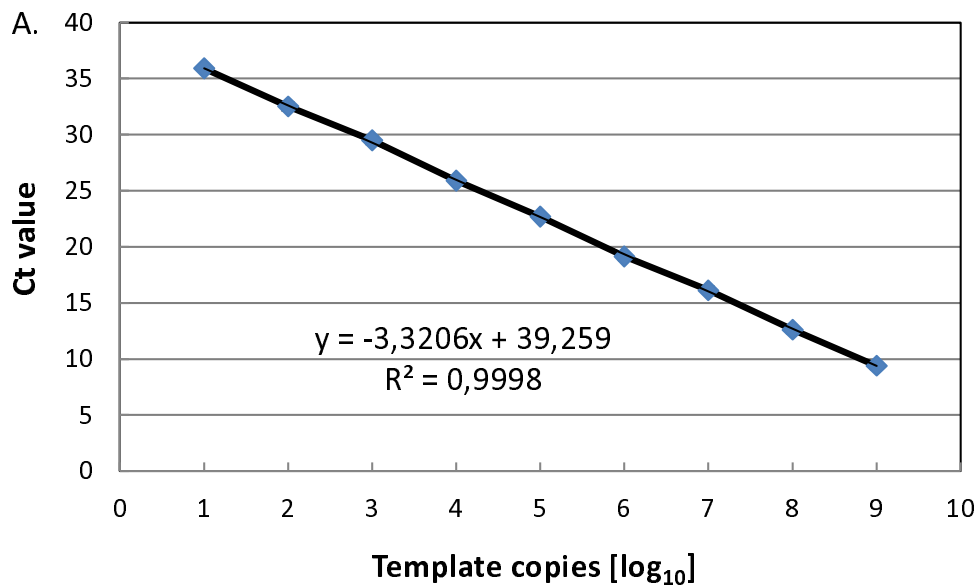

360

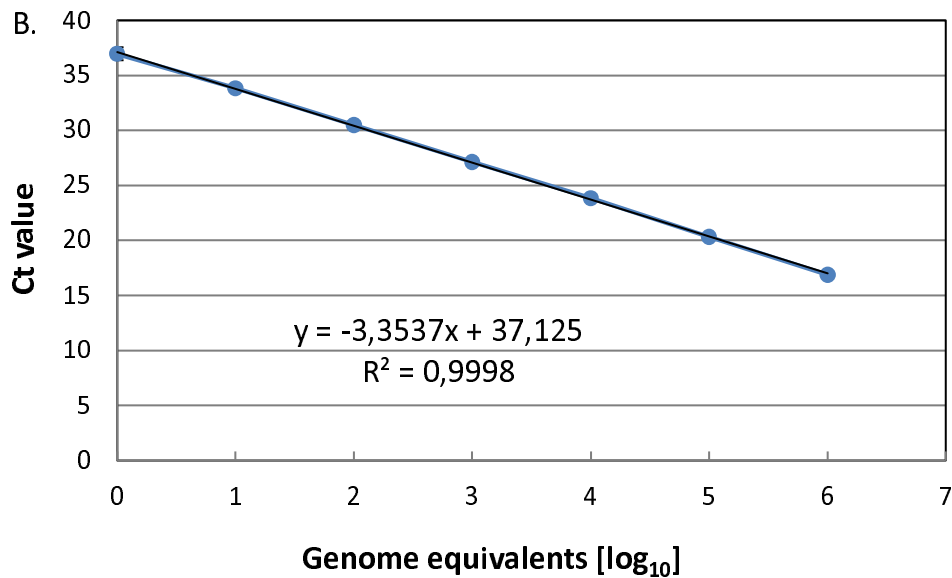

361

362 Figure 1: Linearity of the 16S rRNA SNP-PCR. Serial dilutions of DNA of (A.) a fragment

363 comprising the 16S-BA-allele or (B.) *B. anthracis* strain Ames were serially diluted 1:10,

364 PCR-tested and template copies (A.) or genome equivalents (B.) plotted against Ct values.

365 Indicated in the graphs are the slopes of the linear regressions and the coefficients of

366 determination ( $R^2$ ). Individual data points represent average values from  $n = 3 \times 3$  PCR-tests.

367 Next, we determined the LoD for the 16S rRNA SNP-PCR assay by probit analysis (Figure 2;

368 numerical data in supplementary Table S14). The assay had a limit of detection of 2.9 copies

369 per reaction. This calculates to about 0.6 copies/ $\mu$ l with a probability of success of 95% with

370 confidence interval of 2.4 - 4.5 copies/assay.

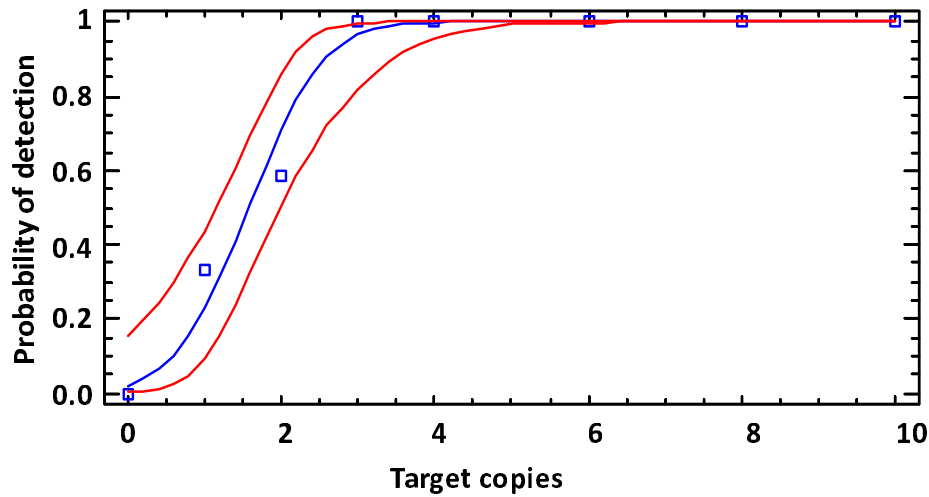

371

372 Figure 2: Limit of detection (LoD) of the 16S rRNA SNP-PCR (analytical sensitivity). DNA  
373 fragments comprising the 16S-BA-allele were diluted to the indicated copies per reaction  
374 (numerical data in supplementary Table S14) and subjected to real time PCR (12 replicates  
375 for each data point). Probit analysis (plot of fitted model) was performed to determine the  
376 LoD by fitting template copies against the cumulative fractions of positive PCR observations  
377 (blue squares and line) and used for calculating the lower and upper 95% confidence limits  
378 (red lines).

### 379 3.5. Comparison of the new 16S rRNA SNP-PCR assay with existing PCR assays.

380 In order to further assess the performance of the 16S rRNA SNP-PCR assay, we compared  
381 it with other established PCR assays for *B. anthracis* identification currently used in our  
382 laboratory. These assays target the single copy genes *dhp61* [9] or *PL3* [6] that have been  
383 individually validated before and compared to other commonly used *B. anthracis* PCRs [11].  
384 Using  $\log_{10}$  dilutions of *B. anthracis* Ames DNA, the 16S rRNA SNP-PCR exhibited markedly,  
385 at least three units, lower Ct values ( $27.9 \pm 0.4$ ;  $31.7 \pm 0.1$ ;  $35.4 \pm 0.7$ ) than *dhp61* ( $32.1 \pm 0.0$ ;

386 35.4±0.6; 38.9±1.5) or *PL3* (31.8±0.2; 36.1±0.7; >40) at 1,000, 100 or 10 genome  
387 equivalents, respectively (Fig. 3). *B. cereus* DNA did not result in amplification by any PCR  
388 assay. This result strongly suggested that the multi-copy 16S rRNA SNP-PCR assay  
389 performs competitively when compared back-to-back with established PCR assays for the  
390 detection of *B. anthracis*.

391

It is made available under a [CC-BY-NC-ND 4.0 International license](https://creativecommons.org/licenses/by-nc-nd/4.0/).

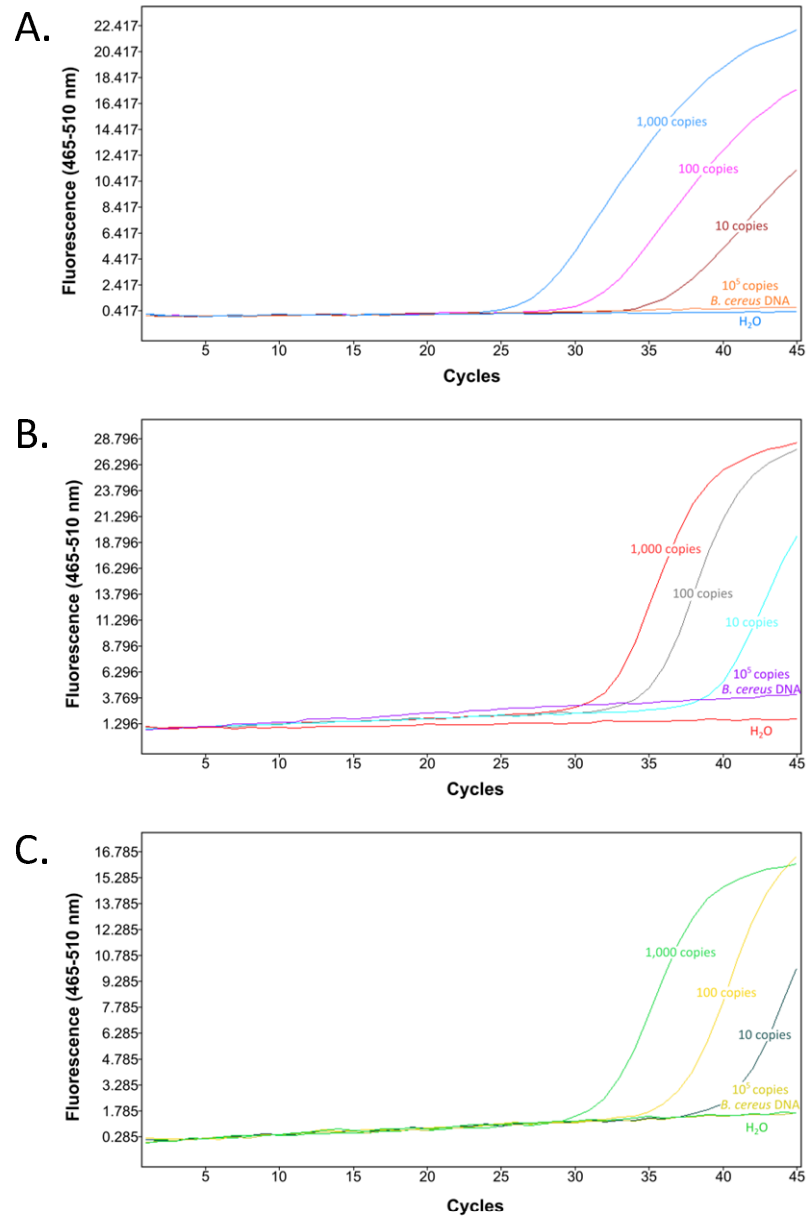

392

393 Figure 3: Comparison of the new 16S rRNA SNP-PCR assay with existing PCR assays.

394 Different numbers of *B. anthracis* Ames template DNA (1,000, 100 or 10 genome equivalents

395 per reaction), non-target DNA ( $10^5$  templates of *B. cereus* DNA) or water (negative) control

396 were subjected to real time PCR using the new 16S rRNA SNP assay (A), published *dhp61*

397 gene assay [9] (B) or published *PL3* gene assay [6] (C). Representative amplification curves

398 (from n=3 with similar results) are shown.

399 3.6. Challenge of the new 16S rRNA SNP-PCR assay with samples from a ring trial.

400 Along this line of reasoning, we next challenged the 16S rRNA SNP-PCR assay with  
401 samples from a previous ring trial for *B. anthracis* nucleic acid detection [27]. Again, the test  
402 was performed in comparison with the established PCR assays for *B. anthracis* identification,  
403 *dhp61* [9] and *PL3* [6]. Each of the assays was able to correctly identify the two positive out  
404 of four samples (supplementary Figure S4). Similar to evaluating known concentrations  
405 (Figure 3), the 16S rRNA SNP-PCR assay performed the best. It yielded the lowest Ct values  
406 (supplementary Figure S4), at least 2 units lower than that of *dhp61* or *PL3* PCR. The 16S  
407 rRNA SNP-PCR assay may thus be ideally suited for this kind of analysis in which low target  
408 DNA quantities can be expected.

409

410 3.7. Challenge of the new 16S rRNA SNP-PCR assay with total DNA from spiked soil  
411 samples.

412 Since the 16S rRNA SNP-PCR assay performed well thus far even in the presence of *E. coli*  
413 and human (supplementary Figure S4) or competing *B. cereus* (supplementary Figure S3)  
414 DNA, we evaluated to what extent the assay would be able to detect target DNA in spiked  
415 soil samples. These samples were spiked with cells of *E. coli* and *F. tularensis* and cells or  
416 endospores of *B. anthracis* and/or *B. thuringiensis* and were subjected to DNA purification.  
417 As above, the 16S rRNA SNP-PCR assay was conducted in comparison with the established  
418 PCR assays for *B. anthracis* identification *dhp61* [9] and *PL3* [6]. Supplementary Figure S5



419 shows the PCR amplification curves. Samples #1, #2 and #4 were samples spiked with *B.*  
420 *anthracis*, sample #3 only contained *E. coli* and *B. thuringiensis*. Sample #4 had a large  
421 excess of *B. thuringiensis* over *B. anthracis* (a factor of  $10^4$ ). The 16S rRNA SNP-PCR assay  
422 detected *B. anthracis* in samples #1 and #2 but not in #4. Conversely, *dhp61* or *PL3* assays  
423 detected all three positive samples. The failure to detect *B. anthracis* by the 16S rRNA SNP-  
424 PCR assay in sample #4 is in line with our initial tests using massive excess of *B. cereus*  
425 DNA competing with *B. anthracis* detection (supplementary Figure S3; Table S9). Notably,  
426 the 16S rRNA SNP-PCR exhibited markedly, about three units, lower Ct values ( $23.6 \pm 0.7$  or  
427  $16.4 \pm 0.0$ ) than *dhp61* ( $26.2 \pm 0.1$  or  $19.9 \pm 0.1$ ) or *PL3* ( $25.7 \pm 0.0$  or  $19.5 \pm 0.1$ ) for samples #1  
428 and #2, respectively. This result confirmed our preceding findings that the 16S rRNA SNP-  
429 PCR assay can reach a lower detection limit than established assay as long as there is no  
430 large excess of other *B. cereus s.l.* DNA competing for amplification primers.

431

432 *3.8. The new 16S rRNA SNP-PCR assay also functions as a RT-PCR assay.*

433 We reasoned that the real time 16S rRNA SNP-PCR assay targeting *B. anthracis* DNA may  
434 be converted into a RT-PCR assay targeting RNA in the form of 16S-BA-allele transcripts  
435 that harbor the *B. anthracis*-specific SNP. In order to test this, cells of *B. anthracis* Sterne or  
436 *B. cereus* 10987 were grown to exponential growth phase, inactivated and total nucleic acids  
437 (including genomic DNA) was isolated alongside parallel preparations of DNA only. The one-  
438 step RT-PCR reaction was thus run with a mixture of genomic DNA and RNA, which can  
439 both be targeted by the assay. For comparison, the above validated 16S rRNA real time

440 SNP-PCR was conducted in parallel with genomic DNA as the only template (no RT-  
441 reaction). When using identical samples, RT-PCR reactions (with templates consisting of  
442 total RNA and DNA) resulted in intensely lower Ct values than without reverse transcription  
443 (since only genomic DNA served as template; Fig. 4). This result indicated that the 16S rRNA  
444 SNP-PCR assay functions both for DNA- and RNA-based (RT) PCR. Notably, differences in  
445 Ct values (RT-PCR vs. PCR) were in the range between 9 and 10 units. This translates to an  
446 about 1,000-fold improvement using RT-PCR over DNA-only PCR.

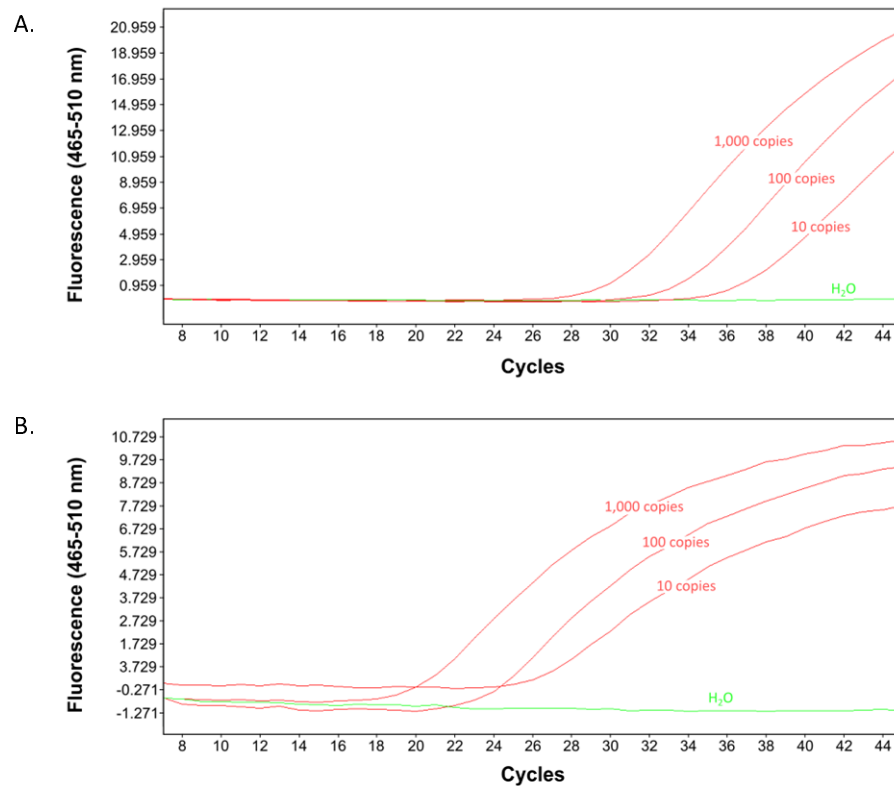

447

448 Figure 4: Comparison of the 16S rRNA SNP-PCR assay (DNA-only) with the RT-16S rRNA  
449 SNP-PCR assay (DNA+RNA). Total DNA or total DNA+RNA isolated from exponentially  
450 growing cells of *B. anthracis* or *B. cereus*, respectively, were used for PCR amplification of

451 16S-BA-allele DNA (A) or additionally after reverse transcription of 16S rRNA (ribosomal  
452 RNA) (B). Representative amplification curves (from n=3 with similar results) are shown.

453 3.9. Linear dynamic range, efficiency and limit of detection of the *B. anthracis* 16S rRNA SNP  
454 RT-PCR assay.

455 To further characterize the RT-PCR, we determined the linear dynamic range and  
456 determined the LoD (Probit) of the 16S rRNA SNP RT-PCR using total RNA/DNA of *B.*  
457 *anthracis* Sterne (similar to DNA-only templates, see above). The RT-PCR was linear over a  
458 range from  $10^0$  to  $10^8$  template rRNA+DNA per reaction (Figure 4A; supplementary Table  
459 S15). The coefficient of determination ( $R^2$ ) was 0.9982 and the efficacy of the RT-PCR was  
460 1.92 (which is 92.3% of the theoretical optimum). Thus, the 16S rRNA SNP RT-PCR assay  
461 performed well over a wide 9  $\log_{10}$  concentration range of template RNA+DNA (higher  
462 template numbers than  $1.5 \times 10^8$  were not tested).

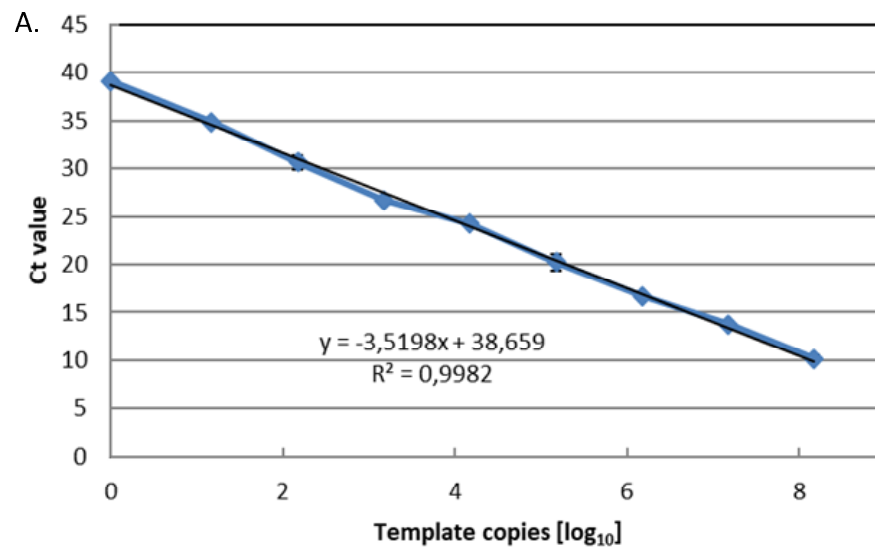

463

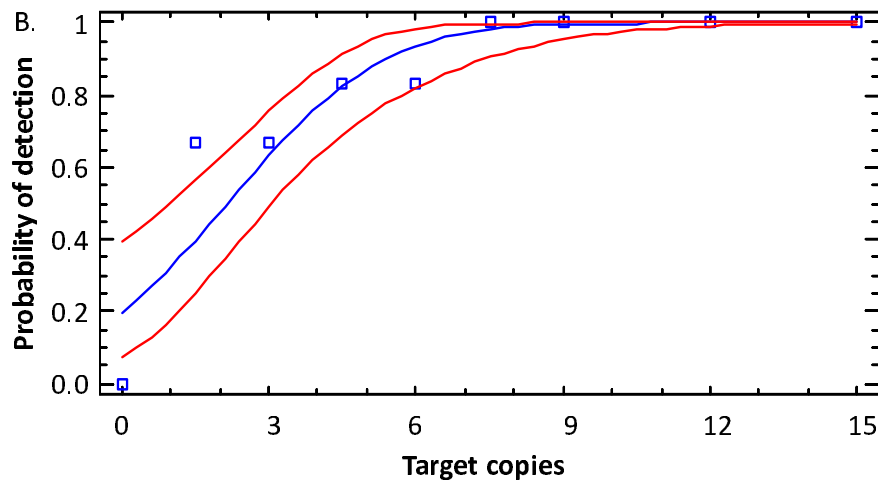

464

465 Figure 5: Linearity and LoD of the 16S rRNA SNP RT-PCR. Serial dilutions of RNA (with  
466 DNA) of *B. anthracis* strain Sterne were serially diluted 1:10, RT-PCR-tested and template  
467 copies plotted against Ct values (A). Indicated in the graph is the slope of the linear  
468 regression and the coefficients of determination ( $R^2$ ). Individual data points represent  
469 average values from  $n = 3 \times 3$  PCR-tests. Analytical sensitivity of the 16S rRNA SNP RT-  
470 PCR was determined by diluting samples from (A) to the indicated copies per reaction  
471 (numerical data in supplementary Table S16) and subjected to RT-PCR (12 replicates for  
472 each data point). To determine the LoD, probit analysis (plot of fitted model, blue squares  
473 and line) was performed (as in Fig. 2) and the lower and upper 95% confidence limits (red  
474 lines) determined (B).

475 The LoD for the 16S rRNA SNP RT-PCR assay as determined by probit analysis (numerical  
476 data in supplementary Table S16) was 6.3 copies per reaction. This calculates to about 1.3  
477 copies/ $\mu$ l with a probability of success of 95% with confidence interval of 5.0 – 8.9  
478 copies/assay. Thus, the RT-PCR reaction performed similarly well as the PCR reaction.

479 Mindful of the about 3 log<sub>10</sub> units higher number of 16S rRNAs in cells than genomes,  
480 detection of *B. anthracis* with the rRNA-directed RT-PCR is superior to the respective real  
481 time PCR assay and all other *B. anthracis* PCR assays tested.

482

#### 483 **4. Discussion**

484 Use of SNPs as reliable markers for the identification of *B. anthracis* among its closest  
485 relatives of the *B. cereus* group is not a novel approach. This has previously been achieved  
486 with high specificity and sensitivity for nucleotide position 640 in the *plcR* gene [10] or at  
487 position 1050 in the *purA* gene [33] and diverse assays were thoroughly evaluated in [11].  
488 Likewise, ribosomal gene sequences and intergenic transcribed spacers (ITS) between 16S  
489 and 23S rRNA genes have also been employed for *B. anthracis* identification in the past [37-  
490 40]. However, while these authors focused on the specific identification of *B. anthracis*, they  
491 neglected the potential of developing a sensitive assay making use of the multi-copy nature  
492 of their targets. An interesting exception is a study on fluorescent DNA-heteroduplex  
493 detection of *B. anthracis* [41]. Herein detection was preceded by general PCR-amplification  
494 of a fragment of the 16S rRNA gene region of *B. cereus s. l.* group strains containing a  
495 presumably specific SNP (pos. 980). This SNP, however, is neither specific for *B. anthracis*  
496 nor for the *B. cereus s.l.* group [24]. Anyway, Merrill et al. succeeded in establishing a LoD  
497 for their PCR of approximately 0.05 pg of purified *B. anthracis* genomic DNA (which can be  
498 calculated to represent 10 to 20 cell equivalents per reaction) [41]. This is higher than the  
499 LoD of about 1 to 2 cell equivalents per reaction found in our study. More importantly, Merrill

500 et al. also took the effort to determine the detection limit of their presumably specific SNP in  
501 mixtures of 16S rRNA gene amplicons from *B. anthracis* and *B. cereus* [41]. The authors  
502 observed a detection limit of 1 out of 50 for *B. anthracis* DNA mixed with *B. cereus* DNA.  
503 They explained this limit as narrowed by methodological constraints and from competitive  
504 hybridization dynamics during probe annealing [41]. This finding can be compared with our  
505 results. The PCR assay developed here was able to detect at least one *B. anthracis*16S-BA-  
506 allele target among 100 BC-allele targets (supplementary Fig. S3 and supplementary Table  
507 S9). At higher alternative (16S-BC-allele) concentrations, these templates will outcompete  
508 the 16S-BA-allele for primer binding. Thus, the higher the fraction of 16S-BC-allele, the lower  
509 the relative amplification of 16S-BA-allele resulting in increasingly non-exponential  
510 amplification of the latter. In contrast, for a SNP in the DNA target *plcR* used for the  
511 differentiation of *B. anthracis* from *B. cereus*, a 20,000-fold excess of the alternate *B. cereus*  
512 allele did not preclude the detection of the *B. anthracis* allele [42]. With *B. cereus* spore  
513 counts in soils spanning a wide range of  $1 \times 10^1$  to  $2.5 \times 10^4$  CFU per g soil [43], the *plcR*  
514 SNP-PCR should be able to detect *B. anthracis* in practically any sample. Here, the new 16S  
515 rRNA SNP-PCR on DNA as target molecule would fall short with only covering up to medium  
516 *B. cereus*-loaded soils. However, when targeting ribosomal RNA the sensitivity (LoD) of the  
517 16S rRNA SNP RT-PCR would be at least three orders of magnitude increased. Then it  
518 should be possible to challenge the LoD values achieved by the *plcR* SNP-PCR (25 fg DNA  
519 or about 5 genome equivalents) [42].

520 A potential limitation of the multi-copy nature of the 16S-BA-allele may be the variable  
521 abundance of this allele in different *B. anthracis* strains. Previously, we could show that most  
522 *B. anthracis* strains harbor 3 (58.39%) 16S-BA-alleles. There are, however also a number of  
523 isolates only possessing 2 (23.04%), 4 (17.10%) 5 (1.15%) and a single one with only 1  
524 (0.31%) 16S-BA-alleles [25]. Thus, in most cases this multi-copy gene allele can be  
525 harnessed nevertheless. A more typical multi-copy marker for detection of bacterial biothreat  
526 agents (and of other pathogens) constitute insertion sequence (IS) elements, which are wide-  
527 spread mobile genetic entities. For instance in *Brucella* spp. *IS711* occurs in multiple  
528 genomic copies and thus, the detection of this *IS711* is very sensitive. *B. melitensis* and *B.*  
529 *suis* contain seven complete copies, *B. abortus* carries six complete and one truncated *IS711*  
530 copies, *B. ovis*, *B. ceti* and *B. pinnipedialis* even more than 20 copies [44]. Consequently, the  
531 lowest concentration of *Brucella* sp. DNA that could be detected was about ten times lower  
532 for *IS711* than e.g., for single copy genes *bcs31* (*Brucella* cell surface 31 kDa protein) or  
533 *per* (perosamine synthetase), respectively [45]. Similarly, in *Coxiella burnetii*, detection  
534 sensitivity of specific *IS1111* was compared to that of the single-copy *icd* gene (isocitrate  
535 dehydrogenase) [46]. While both PCRs for *icd* and *IS1111* had similar LoDs of 10.38 and  
536 6.51, respectively, sensitivity of *IS1111* was still superior because of its multiple copy nature.  
537 Between 7 and 110 copies of this mobile element were found in various *C. burnetii* isolates  
538 [46].

539 The differences in threshold values ( $\Delta\text{Ct} = 9.96 \pm 0.65$ ) of identical samples obtained from  
540 (RT)-PCR using 16S-BA-allele DNA-only vs. 16S-BA-alleleDNA+RNA is enormous. There is

541 an approximate factor of about 1,000 ( $2^{9.96}$ ) times more template in the DNA+RNA sample  
542 than in the DNA-only sample. This factor favorably agrees with the numbers of genome  
543 copies and 16S rRNA transcripts in cells [17, 18]. Similar to the work at hand, earlier work  
544 employed a combination of a DNA multi-copy marker and sensitive detection of rRNA  
545 transcript targets in *Mycobacterium ulcerans* [20]. The authors determined a LoD of 6 copies  
546 of the 16S rRNA transcript target sequence. For comparison, a LoD of two target copies of  
547 the high-copy insertion sequence element *IS2404* which is present in 50 to 100 copies in  
548 different *M. ulcerans* strains was calculated from parallel experiments [20]. Ribosomal RNA  
549 detection was also utilized for *Mycobacterium leprae* diagnosis by the same research team.  
550 Here, a LoD of three *M. leprae* target copies was achieved for a novel 16S rRNA RT-PCR  
551 assay; the same value as determined for the *M. leprae* specific multi-copy repetitive DNA  
552 target assayed in parallel [21]. On first glance these values do not especially speak in favor  
553 of querying for 16S rRNA transcripts, however, one has to consider the high numbers of  
554 these molecules per cell in comparison to DNA markers (including the high-copy ones).  
555 Thus, the chance of capturing one of the more abundant rRNA molecules should be higher  
556 than that of the more limited DNA molecules. Indeed, this idea was explored e.g., for  
557 *Escherichia coli*, *Enterococcus faecalis*, *Staphylococcus aureus*, *Clostridium perfringens*, and  
558 *Pseudomonas aeruginosa* by [19]. Comparative quantitative detection of these bacteria by  
559 RT-PCR (16S rRNA) vs. PCR (16S rRNA genes) revealed that the rRNA-detecting assay  
560 was 64- to 1,024-fold more sensitive than the one detecting DNA. Similarly, work on  
561 pathogenic spirochete *Leptospira* spp. found that 16S rRNA-based assays were at least 100-



562 fold more sensitive than a DNA-based approach [47]. These authors also found that  
563 Leptospiral 16S rRNA molecules remain appreciably stable in blood. From this insight, the  
564 authors then highlighted the potential use of 16S RNA targets for diagnosis of early infection.  
565 Nevertheless, potential limitations of this approach were also noted. Efficacy of the required  
566 reverse transcription reaction has to be considered, RNA molecules are notoriously less  
567 stable than other biomarkers and their cellular abundance (and as a consequence their  
568 detection) can be expected to be variable [47]. Finally, though for qualitative detection not  
569 required, absolute quantification of microbial cells based solely on enumeration of RNA  
570 molecules is complicated because of these variations in transcript numbers depending, e.g.  
571 on growth phase [47]. However, the cell numbers determined by RT-PCR were similar when  
572 compared along-side standard methods such as cell counts, PCR or fluorescence in situ  
573 hybridization (FISH) [48]. Yet, in certain instances, there might be an additional advantage of  
574 performing PCR on rRNA directly (via RT-PCR) instead of targeting DNA (including DNA of  
575 rRNA genes). Because DNA is more stable than RNA, DNA may originate from both live and  
576 dead bacterial cells. In contrast, rRNA molecules may be considered to be more closely  
577 associated with viable bacteria [49]. Though this might also be possible with the new PCR  
578 assays introduced in the work at hand, we chose to combine DNA and rRNA detection in a  
579 single test-tube for the sake of simplicity (no troublesome DNase treatment of purified RNA  
580 required) and depth of detection.

581

## 582 **5. Conclusions**

583 In this work, we designed and validated a new PCR-based detection assay for the biothreat  
584 agent *B. anthracis*. This assay can be run as a real-time PCR with solely DNA as template or  
585 as a RT-real-time version using both cellular nucleic acid pools (DNA and RNA) as template.  
586 This assay was found to be highly species specific yielding no false positives and was  
587 sensitive with a LoD of about 0.6 copies/ $\mu$ l (DNA-only) and about 1.3 copies/ $\mu$ l (DNA+RNA).  
588 With the high abundance of 16S rRNA moieties in cells this assay can be expected to  
589 facilitate the detection of *B. anthracis* by PCR.

590

591

592 **Supplementary Materials:** The following are available online: Supplementary Tables 1 – 16;  
593 Supplementary Figures 1 – 6.

594

595 **Author Contributions:** Conceptualization, G.G. and P.B.; investigation, P.B., M.D.T.N.,  
596 M.C.W.; methodology, M.D.T.N., and P.B.; formal analysis and validation, P.B., M.D.T.N. and  
597 G.G.; resources, G.G. and M.C.W.; data curation, P.B., M.D.T.N. and M.C.W.; writing—  
598 original draft preparation, G.G., and P.B.; writing—review and editing, P.B., M.D.T.N.,  
599 M.C.W. and G.G.; visualization, M.D.T.N., P.B. and G.G.; supervision and project  
600 administration, G.G., and P.B.; funding acquisition, G.G. All authors have read and agreed to  
601 the published version of the manuscript.

602 **Funding:** This research was funded by funds from the Medical Biological Defense Research  
603 Program of the Bundeswehr Joint Medical Service.

604 **Acknowledgments:** The authors thank Mandy Knüper (Bundeswehr Institute of  
605 Microbiology) for support with probit-analysis and the gift of DNA from spiked soil samples,  
606 Stefanie Gläser (Justus-Liebig-University Gießen, Germany) Erwin Märtlbauer (Ludwig-  
607 Maximilians-University, Munich, Germany) and Monika-Ehling Schultz (University of  
608 Veterinary Medicine, Vienna, Austria) for several *B. cereus* strains, as well as Paul Keim  
609 (Northern Arizona University, Flagstaff, USA), and Wolfgang Beyer (Hohenheim University,  
610 Stuttgart, Germany) for the gift of *B. anthracis* strains/DNA. Thanks are due to Rahime  
611 Terzioglu for technical assistance and Olfert Landt (TIB Molbiol, Berlin) for support in probe  
612 design.

613 **Conflicts of Interest:** The authors declare no conflict of interest. Opinions, interpretations,  
614 conclusions, and recommendations are those of the authors and are not necessarily  
615 endorsed by any governmental agency, department or other institutions. The funders had no  
616 role in the design of the study; in the collection, analyses, or interpretation of data; in the  
617 writing of the manuscript, or in the decision to publish the results.

## 618 **References**

619 [1] P.C. Turnbull, World Health Organization. Anthrax in humans and animals, in: P.T.  
620 (Editor) (Ed.) WHO Press, Geneva (CH), 2008.

621 [2] M. Ehling-Schulz, D. Lereclus, T.M. Koehler, The *Bacillus cereus* group: *Bacillus* species  
622 with pathogenic potential, *Microbiol Spectr* 7(3) (2019).

623 [3] M. Mock, A. Fouet, Anthrax, *Annu Rev Microbiol* 55 (2001) 647-71.

624 [4] T.M. Jelacic, D.J. Chabot, J.A. Bozue, S.A. Tobery, M.W. West, K. Moody, D. Yang, J.J.  
625 Oppenheim, A.M. Friedlander, Exposure to *Bacillus anthracis* capsule results in suppression  
626 of human monocyte-derived dendritic cells, *Infect Immun* 82(8) (2014) 3405-16.

627 [5] R. Patino-Navarrete, V. Sanchis, Evolutionary processes and environmental factors  
628 underlying the genetic diversity and lifestyles of *Bacillus cereus* group bacteria, *Res Microbiol*  
629 168(4) (2017) 309-318.

630 [6] P.R. Wielinga, R.A. Hamidjaja, J. Agren, R. Knutsson, B. Segerman, M. Fricker, M.  
631 Ehling-Schulz, A. de Groot, J. Burton, T. Brooks, I. Janse, B. van Rotterdam, A multiplex  
632 real-time PCR for identifying and differentiating *B. anthracis* virulent types, *Int J Food*  
633 *Microbiol* 145 Suppl 1 (2011) S137-44.

634 [7] H. Ellerbrok, H. Nattermann, M. Ozel, L. Beutin, B. Appel, G. Pauli, Rapid and sensitive  
635 identification of pathogenic and apathogenic *Bacillus anthracis* by real-time PCR, *FEMS*  
636 *Microbiol Lett* 214(1) (2002) 51-9.

637 [8] V. Ramisse, G. Patra, H. Garrigue, J.L. Guesdon, M. Mock, Identification and  
638 characterization of *Bacillus anthracis* by multiplex PCR analysis of sequences on plasmids  
639 pXO1 and pXO2 and chromosomal DNA, *FEMS Microbiol Lett* 145(1) (1996) 9-16.

- 640 [9] M.H. Antwerpen, P. Zimmermann, K. Bewley, D. Frangoulidis, H. Meyer, Real-time PCR  
641 system targeting a chromosomal marker specific for *Bacillus anthracis*, Mol Cell Probes 22(5-  
642 6) (2008) 313-5.
- 643 [10] W.R. Easterday, M.N. Van Ert, T.S. Simonson, D.M. Wagner, L.J. Kenefic, C.J. Allender,  
644 P. Keim, Use of single nucleotide polymorphisms in the *plcR* gene for specific identification of  
645 *Bacillus anthracis*, J Clin Microbiol 43(4) (2005) 1995-7.
- 646 [11] J. Ågren, R.A. Hamidjaja, T. Hansen, R. Ruuls, S. Thierry, H. Vigre, I. Janse, A.  
647 Sundström, B. Segerman, M. Koene, C. Löfström, B. Van Rotterdam, S. Derzelle, In silico  
648 and in vitro evaluation of PCR-based assays for the detection of *Bacillus anthracis*  
649 chromosomal signature sequences, Virulence 4(8) (2013) 671-85.
- 650 [12] T. Straub, C. Baird, R.A. Bartholomew, H. Colburn, D. Seiner, K. Victry, L. Zhang, C.J.  
651 Bruckner-Lea, Estimated copy number of *Bacillus anthracis* plasmids pXO1 and pXO2 using  
652 digital PCR, J Microbiol Methods 92(1) (2013) 9-10.
- 653 [13] A. Pena-Gonzalez, R.L. Rodriguez, C.K. Marston, J.E. Gee, C.A. Gulvik, C.B. Kolton, E.  
654 Saile, M. Frace, A.R. Hoffmaster, K.T. Konstantinidis, Genomic characterization and copy  
655 number variation of *Bacillus anthracis* plasmids pXO1 and pXO2 in a historical collection of  
656 412 strains, mSystems 3(4) (2018).
- 657 [14] M.C. Hansen, A.K. Nielsen, S. Molin, K. Hammer, M. Kilstrup, Changes in rRNA levels  
658 during stress invalidates results from mRNA blotting: fluorescence in situ rRNA hybridization

659 permits renormalization for estimation of cellular mRNA levels, J Bacteriol 183(16) (2001)

660 4747-51.

661 [15] H. Bremer, P.P. Dennis, Modulation of chemical composition and other parameters of

662 the cell at different exponential growth rates, EcoSal Plus 3(1) (2008).

663 [16] J.R. Wiśniewski, D. Rakus, Multi-enzyme digestion FASP and the 'Total Protein

664 Approach'-based absolute quantification of the *Escherichia coli* proteome, J Proteomics 109

665 (2014) 322-31.

666 [17] M.S. van Dijk-Salkinoja, R.J. Planta, Rate of ribosome production in *Bacillus*

667 *licheniformis*, Journal of Bacteriology 105(1) (1971) 20-27.

668 [18] A. Barrera, T. Pan, Interaction of the *Bacillus subtilis* RNase P with the 30S ribosomal

669 subunit, RNA 10(3) (2004) 482-92.

670 [19] K. Matsuda, H. Tsuji, T. Asahara, Y. Kado, K. Nomoto, Sensitive quantitative detection

671 of commensal bacteria by rRNA-targeted reverse transcription-PCR, Applied and

672 Environmental Microbiology 73(1) (2007) 32-39.

673 [20] M. Beissner, D. Symanek, R.O. Phillips, Y.A. Amoako, N.Y. Awua-Boateng, F.S. Sarfo, M.

674 Jansson, K.L. Huber, K.H. Herbinger, F. Battke, T. Löscher, O. Adjei, G. Bretzel, Detection of

675 viable *Mycobacterium ulcerans* in clinical samples by a novel combined 16S rRNA reverse

676 transcriptase/IS2404 real-time qPCR assay, PLoS Negl Trop Dis 6(8) (2012) e1756.

677 [21] M. Beissner, A. Woestemeier, M. Saar, K. Badziklou, I. Maman, C. Amedifou, M.

678 Wagner, F.X. Wiedemann, K. Amekuse, B. Kobara, K.H. Herbinger, A.B. Kere, T. Löscher,

679 G. Bretzel, Development of a combined RLEP/16S rRNA (RT) qPCR assay for the detection  
680 of viable *M. leprae* from nasal swab samples, BMC Infect Dis 19(1) (2019) 753.

681 [22] C. Ash, J.A. Farrow, M. Dorsch, E. Stackebrandt, M.D. Collins, Comparative analysis of  
682 *Bacillus anthracis*, *Bacillus cereus*, and related species on the basis of reverse transcriptase  
683 sequencing of 16S rRNA, Int J Syst Bacteriol 41(3) (1991) 343-6.

684 [23] B. Candelon, K. Guilloux, S.D. Ehrlich, A. Sorokin, Two distinct types of rRNA operons in  
685 the *Bacillus cereus* group, Microbiology 150(Pt 3) (2004) 601-11.

686 [24] J.R. Hakovirta, S. Prezioso, D. Hodge, S.P. Pillai, L.M. Weigel, Identification and  
687 analysis of informative single nucleotide polymorphisms in 16S rRNA gene sequences of the  
688 *Bacillus cereus* group, J Clin Microbiol (2016).

689 [25] P. Braun, F. Zimmermann, M.C. Walter, S. Mantel, K. Aistleitner, I. Stürz, G. Grass, K.  
690 Stoecker, In-depth analysis of *Bacillus anthracis* 16S rRNA genes and  
691 transcripts reveals intra- and intergenomic diversity and facilitates anthrax detection, bioRxiv  
692 (2021) 2021.08.02.454851.

693 [26] P. Braun, G. Grass, A. Aceti, L. Serrecchia, A. Affuso, L. Marino, S. Grimaldi, S. Pagano,  
694 M. Hanczaruk, E. Georgi, B. Northoff, A. Schöler, M. Schlöter, M. Antwerpen, A. Fasanella,  
695 Microevolution of anthrax from a young ancestor (M.A.Y.A.) suggests a soil-borne life cycle  
696 of *Bacillus anthracis*, PLoS ONE 10(8) (2015) e0135346.

697 [27] U. Reischl, M. Ehrenschwender, A. Hiergeist, M. Maaß, M. Baier, D. Frangoulidis, G.  
698 Grass, H. von Buttlar, H. Scholz, V. Fingerle, S. Sing, R. Dumke, I. Reiter-Owona, A.B.

699 Anders, Bacterial and fungal genome detection PCR/NAT: comprehensive discussion of the  
700 June 2018 distribution for external quality assessment of nucleic acid-based protocols in  
701 diagnostic medical microbiology by INSTAND e.V., GMS Z Forder Qualitatssich Med Lab  
702 10(ISSN 1869-4241) (2019) Doc01.

703 [28] S.F. Altschul, W. Gish, W. Miller, E.W. Myers, D.J. Lipman, Basic local alignment search  
704 tool, J Mol Biol 215(3) (1990) 403-10.

705 [29] A.A. Koshkin, S.K. Singh, P. Nielsen, V.K. Rajwanshi, R. Kumar, M. Meldgaard, C.E.  
706 Olsen, J. Wengel, LNA (Locked Nucleic Acids): Synthesis of the adenine, cytosine, guanine,  
707 5-methylcytosine, thymine and uracil bicyclonucleoside monomers, oligomerisation, and  
708 unprecedented nucleic acid recognition, Tetrahedron 54(14) (1998) 3607-3630.

709 [30] S. Perelle, F. Dilasser, J. Grout, P. Fach, Detection by 5'-nuclease PCR of Shiga-toxin  
710 producing *Escherichia coli* O26, O55, O91, O103, O111, O113, O145 and O157:H7,  
711 associated with the world's most frequent clinical cases, Mol Cell Probes 18(3) (2004) 185-  
712 92.

713 [31] G. Stolovitzky, G. Cecchi, Efficiency of DNA replication in the polymerase chain reaction,  
714 Proc Natl Acad Sci U S A 93(23) (1996) 12947-52.

715 [32] A. Forootan, R. Sjöback, J. Björkman, B. Sjögreen, L. Linz, M. Kubista, Methods to  
716 determine limit of detection and limit of quantification in quantitative real-time PCR (qPCR),  
717 Biomolecular detection and quantification 12 (2017) 1-6.



- 718 [33] L.M. Irengé, J.F. Durant, H. Tomaso, P. Pilo, J.S. Olsen, V. Ramisse, J. Mahillon, J.L.  
719 Gala, Development and validation of a real-time quantitative PCR assay for rapid  
720 identification of *Bacillus anthracis* in environmental samples, *Appl Microbiol Biotechnol* 88(5)  
721 (2010) 1179-92.
- 722 [34] J.W. Sahl, T. Pearson, R. Okinaka, J.M. Schupp, J.D. Gillece, H. Heaton, D. Birdsell, C.  
723 Hepp, V. Fofanov, R. Nosedá, A. Fasanella, A. Hoffmaster, D.M. Wagner, P. Keim, A  
724 *Bacillus anthracis* genome sequence from the Sverdlovsk 1979 autopsy specimens, *MBio*  
725 7(5) (2016) e01501-16.
- 726 [35] M. Antwerpen, W. Beyer, O. Bassy, M.V. Ortega-García, J.C. Cabria-Ramos, G. Grass,  
727 R. Wölfel, Phylogenetic placement of isolates within the Trans-Eurasian clade A.Br.008/009  
728 of *Bacillus anthracis*, *Microorganisms* 7(12) (2019) 689.
- 729 [36] P. Kämpfer, H.J. Busse, J.A. McInroy, S.P. Glaeser, *Sphingomonas zeae* sp. nov.,  
730 isolated from the stem of *Zea mays*, *Int J Syst Evol Microbiol* 65(8) (2015) 2542-2548.
- 731 [37] U. Nübel, P.M. Schmidt, E. Reiß, F. Bier, W. Beyer, D. Naumann, Oligonucleotide  
732 microarray for identification of *Bacillus anthracis* based on intergenic transcribed spacers in  
733 ribosomal DNA, *FEMS Microbiology Letters* 240(2) (2004) 215-223.
- 734 [38] D. Daffonchio, N. Raddadi, M. Merabishvili, A. Cherif, L. Carmagnola, L. Brusetti, A.  
735 Rizzi, N. Chanishvili, P. Visca, R. Sharp, S. Borin, Strategy for identification of *Bacillus*  
736 *cereus* and *Bacillus thuringiensis* strains closely related to *Bacillus anthracis*, *Appl Environ*  
737 *Microbiol* 72(2) (2006) 1295-301.

738 [39] A. Cherif, S. Borin, A. Rizzi, H. Ouzari, A. Boudabous, D. Daffonchio, *Bacillus anthracis*  
739 diverges from related clades of the *Bacillus cereus* group in 16S-23S ribosomal DNA  
740 intergenic transcribed spacers containing tRNA genes, *Appl Environ Microbiol* 69(1) (2003)  
741 33-40.

742 [40] A.V. Hadjinicolaou, V.L. Demetriou, J. Hezka, W. Beyer, T.L. Hadfield, L.G. Kostrikis,  
743 Use of molecular beacons and multi-allelic real-time PCR for detection of and discrimination  
744 between virulent *Bacillus anthracis* and other *Bacillus* isolates, *J Microbiol Methods* 78(1)  
745 (2009) 45-53.

746 [41] L. Merrill, J. Richardson, C.R. Kuske, J. Dunbar, Fluorescent heteroduplex assay for  
747 monitoring *Bacillus anthracis* and close relatives in environmental samples, *Appl Environ*  
748 *Microbiol* 69(6) (2003) 3317-26.

749 [42] W.R. Easterday, M.N. Van Ert, S. Zanecki, P. Keim, Specific detection of *Bacillus*  
750 *anthracis* using a TaqMan mismatch amplification mutation assay, *Biotechniques* 38(5)  
751 (2005) 731-5.

752 [43] M. Altayar, A.D. Sutherland, *Bacillus cereus* is common in the environment but emetic  
753 toxin producing isolates are rare, *Journal of Applied Microbiology* 100(1) (2006) 7-14.

754 [44] M. Mancilla, M. Ulloa, I. López-Goñi, I. Moriyón, A. María Zárraga, Identification of new  
755 IS711 insertion sites in *Brucella abortus* field isolates, *BMC Microbiol* 11 (2011) 176.

756 [45] L. Bounaadja, D. Albert, B. Chénais, S. Hénault, M.S. Zygmunt, S. Poliak, B. Garin-  
757 Bastuji, Real-time PCR for identification of *Brucella* spp.: a comparative study of *IS711*,  
758 *bcs31* and *per* target genes, *Vet Microbiol* 137(1-2) (2009) 156-64.

759 [46] S.R. Klee, J. Tyczka, H. Ellerbrok, T. Franz, S. Linke, G. Baljer, B. Appel, Highly  
760 sensitive real-time PCR for specific detection and quantification of *Coxiella burnetii*, *BMC*  
761 *Microbiol* 6 (2006) 2.

762 [47] B.T. Backstedt, O. Buyuktanir, J. Lindow, E.A. Wunder, Jr., M.G. Reis, S. Usmani-  
763 Brown, M. Ledizet, A. Ko, U. Pal, Efficient detection of pathogenic *Leptospires* using 16S  
764 ribosomal RNA, *PLoS ONE* 10(6) (2015) e0128913.

765 [48] H. Kubota, H. Tsuji, K. Matsuda, T. Kurakawa, T. Asahara, K. Nomoto, Detection of  
766 human intestinal catalase-negative, Gram-positive cocci by rRNA-targeted reverse  
767 transcription-PCR, *Applied and Environmental Microbiology* 76(16) (2010) 5440-5451.

768 [49] H. Tsuji, K. Matsuda, K. Nomoto, Counting the countless: Bacterial quantification by  
769 targeting rRNA molecules to explore the human gut microbiota in health and disease, *Front*  
770 *Microbiol* 9 (2018) 1417.

771

772
