# Supplementary material for: Ultrasensitive detection of Bacillus anthracis by real time PCR targeting a polymorphism in multi-copy 16S rRNA genes and their transcripts
Source: bioRxiv or medRxiv preprint supplement (doi:10.1101/2021.09.20.21263746), 2021-09-23
Supplement: Supplementary file [file media-1.pdf]

# Ultrasensitive detection of *Bacillus anthracis* by real time PCR targeting a polymorphism in multi-copy 16S rRNA genes and their transcripts

Peter Braun<sup>1</sup>, Martin Duy-Thanh Nguyen<sup>1</sup>, Mathias C. Walter<sup>1</sup> and Gregor Grass<sup>1\*</sup>

<sup>1</sup>Bundeswehr Institute of Microbiology (IMB), Munich, Germany; [martin2nguyen@bundeswehr.org](mailto:martin2nguyen@bundeswehr.org) (MDTN); [peter3braun@bundeswehr.org](mailto:peter3braun@bundeswehr.org) (P.B); [mathias1walter@bundeswehr.org](mailto:mathias1walter@bundeswehr.org) (MCW); [gregorgrass@bundeswehr.org](mailto:gregorgrass@bundeswehr.org) (G.G.)

\* Correspondence: [gregorgrass@bundeswehr.org](mailto:gregorgrass@bundeswehr.org); Tel.: +49-992692-3981

## 6. Supplementary Material

### 6.1. Supplementary Tables

Supplementary Table S1: Temperature optimum.

| Annealing temperature (°C) | Ct-values ( $\bar{O} \pm SD$ )* | Fluorescence (arbitrary units)** |
|----------------------------|---------------------------------|----------------------------------|
| 61                         | 33.1 $\pm$ 0.1                  | 27.9 $\pm$ 0.9                   |
| 62                         | 32.7 $\pm$ 0.2                  | 32.1 $\pm$ 1.1                   |
| 63                         | 32.5 $\pm$ 0.2                  | 28.0 $\pm$ 0.9                   |
| 64                         | 32.7 $\pm$ 0.1                  | 25.2 $\pm$ 0.4                   |

\* averages ( $\bar{O}$ )  $\pm$  standard deviations (SD) of n = 3 tests; \*\* value at the end of the 42th PCR cycle.

Supplementary Table S2: Primer titration.

| Primer concentrations ( $\mu$ M) | Ct-values ( $\bar{O} \pm SD$ )* | Fluorescence (arbitrary units)** |
|----------------------------------|---------------------------------|----------------------------------|
| 0.5 / 0.5                        | 26.6 $\pm$ 0.9                  | 13.8 $\pm$ 0.4                   |
| 0.25 / 0.5                       | 26.5 $\pm$ 0.5                  | 9.7 $\pm$ 0.4                    |
| 0.5 / 0.25                       | 27.2 $\pm$ 0.1                  | 11.7 $\pm$ 0.2                   |
| 0.25 / 0.25                      | 26.6 $\pm$ 0.1                  | 6.0 $\pm$ 0.4                    |
| 1 / 0.5                          | 27.6 $\pm$ 0.2                  | 12.8 $\pm$ 0.6                   |
| 0.5 / 1                          | 27.3 $\pm$ 0.2                  | 15.0 $\pm$ 0.4                   |
| 1 / 1                            | 26.6 $\pm$ 0.7                  | 13.0 $\pm$ 0.5                   |

\* Average ( $\bar{O}$ )  $\pm$  standard deviations (SD) of n = 3 tests; \*\* Value at the end of the 42th PCR cycle.

Supplementary Table S3: Probe titration.

| Probe concentration<br>BA* / BC** (μM) | Ct-values (Ø±SD)*** | Fluorescence<br>(arbitrary units)**** |
|----------------------------------------|---------------------|---------------------------------------|
| 0.25 / 0.25                            | 27.5±0.3            | 15.9±0.2                              |
| 0.125 / 0.25                           | 27.5±0.2            | 9.2±0.5                               |
| 0.25 / 0.125                           | 27.8±0.1            | 16.2±0.1                              |
| 0.125 / 0.125                          | 27.4±0.6            | 9.9±0.5                               |
| 0.5 / 0.25                             | 27.3±0.6            | 24.8±1.6                              |
| 0.25 / 0.5                             | 27.5±0.3            | 14.7±0.3                              |
| 0.5 / 0.5                              | 27.7±0.4            | 23.2±1.7                              |

\* 6-FAM-labeled (hybridizes against the *B. anthracis*-specific allele of the 16S rRNA gene); \*\* „dark“ probe lacking fluorescent label (hybridizes against the *B. cereus* allele of the 16S rRNA gene); \*\*\* averages (Ø) ± standard deviations (SD) of n = 3 tests; \*\*\*\* value at the end of the 42th PCR cycle.

Supplementary Table S4: Magnesium ion titration.

| MgCl <sub>2</sub> concentration<br>(mM) | Ct-values<br>(Ø±SD)* | Fluorescence<br>(arbitrary units)** |
|-----------------------------------------|----------------------|-------------------------------------|
| 1                                       | 28.8±0.3             | 2.8±0.3                             |
| 2                                       | 27.5±0.7             | 10.0±0.5                            |
| 3                                       | 28.1±0.4             | 23.3±1.9                            |
| 4                                       | 27.8±0.4             | 21.3±1.2                            |

\* averages (Ø) ± standard deviations (SD) of n = 3 tests; \*\* value at the end of the 42th PCR cycle.

Supplementary Table S5: Pipetting error (5%).

| Reaction volume<br>(μl) | Ct-values<br>(Ø±SD)* | Fluorescence<br>(arbitrary units)** |
|-------------------------|----------------------|-------------------------------------|
| 19                      | 28.6±0.4             | 47.3±6.0                            |
| 20                      | 28.9±0.1             | 46.4±3.8                            |
| 21                      | 29.1±0.1             | 44.5±5.4                            |

\* averages (Ø) ± standard deviations (SD) of n = 3 tests; \*\* value at the end of the 42th PCR cycle.

Supplementary Table S6: Intra assay variability\*.

| Strain  | Assay 1 | Assay 2 | Assay 3 | Ct-values<br>( $\bar{\emptyset} \pm \text{SD}$ )** | CV*** |
|---------|---------|---------|---------|----------------------------------------------------|-------|
| L3-2641 | 32.4    | 32.7    | 33.1    | 32.7 $\pm$ 0.3                                     | 1.0   |
| L3-2649 | 34.3    | 33.8    | 33.6    | 33.9 $\pm$ 0.3                                     | 1.1   |
| L3-2657 | 33.8    | 33.9    | 33.9    | 33.9 $\pm$ 0.1                                     | 0.2   |
| L3-2665 | 31.7    | 31.9    | 31.9    | 31.8 $\pm$ 0.1                                     | 0.4   |
| L3-2866 | 31.7    | 31.9    | 31.9    | 31.8 $\pm$ 0.1                                     | 0.4   |
| L3-3391 | 24.2    | 24.2    | 24.3    | 24.2 $\pm$ 0.0                                     | 0.3   |
| L3-3399 | 22.8    | 22.7    | 22.7    | 22.7 $\pm$ 0.0                                     | 0.1   |
| L3-3407 | 23.4    | 23.4    | 23.3    | 23.4 $\pm$ 0.0                                     | 0.2   |
| L3-3408 | 22.9    | 22.9    | 22.9    | 22.9 $\pm$ 0.0                                     | 0.3   |
| L3-3415 | 22.4    | 22.4    | 22.4    | 22.4 $\pm$ 0.0                                     | 0.0   |
| L3-3416 | 23.5    | 23.6    | 23.7    | 23.6 $\pm$ 0.1                                     | 0.3   |
| L3-3421 | 22.5    | 22.4    | 22.2    | 22.4 $\pm$ 0.2                                     | 0.2   |

\* replicates (n=3) of each PCR reaction with target DNA were run on the same day; \*\* averages ( $\bar{\emptyset}$ )  $\pm$  standard deviations (SD) of n = 3 tests; \*\*\* coefficient of variation (%).

Supplementary Table S7: Inter assay variability\*.

| Template copies | Assays day 1           | Assays day 2           | Assays day 3           | Ct-value<br>( $\bar{\emptyset} \pm \text{SD}$ )** | CV*** |
|-----------------|------------------------|------------------------|------------------------|---------------------------------------------------|-------|
| 10 <sup>4</sup> | 25.9;<br>25.8;<br>26.0 | 26.2;<br>26.3;<br>26.3 | 25.6;<br>25.6;<br>25.6 | 25.9 $\pm$ 0.3                                    | 1.2   |
| 10 <sup>2</sup> | 32.3;<br>32.9;<br>32.3 | 32.9;<br>33.0;<br>32.8 | 32.4;<br>32.2;<br>32.0 | 32.5 $\pm$ 0.3                                    | 1.1   |

\* replicates (n=3) of each PCR reaction with target DNA were run on three consecutive days; \*\* averages ( $\bar{\emptyset}$ )  $\pm$  standard deviations (SD) of n = 3 x 3 tests; \*\*\* coefficient of variation (%).

Supplementary Table S8: Probe titration in the presence of 10<sup>9</sup> copies of 16S-BC-allele (absence of 16S-BA-allele).

| Probe concentration<br>BA*/BC** ( $\mu\text{M}$ ) [BA/BC] | Ct-values | Fluorescence<br>(arbitrary units)**** |
|-----------------------------------------------------------|-----------|---------------------------------------|
| 0.25 / 0.25 [1:1]                                         | -***      | 1.6 $\pm$ 0.0                         |
| 0.25 / 0.5 [1:2]                                          | -***      | 1.1 $\pm$ 0.4                         |
| 0.25 / 0.75 [1:3]                                         | -***      | 0.82 $\pm$ 0.4                        |
| 0.25 / 1.0 [1:4]                                          | -***      | 1.4 $\pm$ 0.3                         |

\* 6-FAM-labeled (hybridizes against the *B. anthracis*-specific 16S-BA-allele of the 16S rRNA gene); \*\* „dark“ probe lacking fluorescent label (hybridizes against the *B. cereus* 16S-BC-allele of the 16S rRNA gene); \*\*\* no regular amplification, no CT-value; \*\*\*\* value at the end of the 42th PCR cycle.

Supplementary Table S9: Optimized probe concentration for the detection of the 16S-BA-allele (100 target copies) in the presence of increasing copies of the alternative BC-allele.

| Assay Number | 16S-BC-allele concentration (copies per reaction)* | Ct value ( $\bar{O} \pm SD$ )** | Fluorescence (arbitrary units)*** |
|--------------|----------------------------------------------------|---------------------------------|-----------------------------------|
| 1            | 10 <sup>8</sup>                                    | ****                            | 3.63±0.3                          |
| 2            | 10 <sup>7</sup>                                    | ****                            | 3.44±0.2                          |
| 3            | 10 <sup>6</sup>                                    | ****                            | 3.35±0.1                          |
| 4            | 10 <sup>5</sup>                                    | 33.4±0.6                        | 3.8±0.1                           |
| 5            | 7.5 x 10 <sup>4</sup>                              | 34.0±1.3                        | 4.8±0.7                           |
| 6            | 5 x 10 <sup>4</sup>                                | 35.0±0.4                        | 5.2±0.5                           |
| 7            | 2.5 x 10 <sup>4</sup>                              | 34.2±0.3                        | 6.9±0.3                           |
| 8            | 10 <sup>4</sup>                                    | 33.4±0.8                        | 8.6±0.8                           |
| 9            | 10 <sup>3</sup>                                    | 32.6±0.1                        | 17.9±0.6                          |
| 10           | 10 <sup>2</sup>                                    | 32.9±0.1                        | 25.7±0.7                          |
| 11           | no BA. only 10 <sup>5</sup> BC                     | ****                            | 2.6±0.1                           |
| 12           | no BA. only 0.5 x 10 <sup>5</sup> BC               | ****                            | 2.3±0.4                           |
| 13           | positive control (only BA)                         | 33.0±0.2                        | 31.3±4.3                          |
| 14           | negative control (H <sub>2</sub> O)                | -                               | -                                 |

\* 16S-BA-allele concentration constant at 100 copies per reaction; \*\* averages ( $\bar{O}$ ) ± standard deviations (SD) of n = 3 tests; \*\*\* value at the end of the 42th PCR cycle; \*\*\*\* no regular amplification, no CT-value.

Supplementary Table S10: Sensitivity panel - target organism *B. anthracis*.

| # of <i>B. anthracis</i> strains | Phylogeny*                       | PCR result** |
|----------------------------------|----------------------------------|--------------|
| 1                                | C.Br. A1055                      | positive     |
| 3                                | B.Br. CNEVA                      | positive     |
| 1                                | B.Br. Kruger B                   | positive     |
| 5                                | A.Br. 001/002                    | positive     |
| 1                                | A.Br. 011/009; A.Br.118 (STI)    | positive     |
| 1                                | A.Br. 005/006                    | positive     |
| 1                                | A.Br. Vollum                     | positive     |
| 1                                | A.Br. Aust 94                    | positive     |
| 5                                | A.Br. Aust 94; A.Br.014          | positive     |
| 1                                | A.Br. Aust 94; A.Br.015          | positive     |
| 2                                | A.Br. 008/011; A.Br.127 (Pstr)   | positive     |
| 1                                | A.Br. 008/011; A.Br.127(BUL)     | positive     |
| 1                                | A.Br. 008/011; A.Br.161 (Heroin) | positive     |
| 1                                | A.Br. WNA                        | positive     |

\* phylogeny according to (1) and (2); \*\* results of n = 3 tests.

Supplementary Table S11: Specificity panel - potentially cross-reacting organisms.

| Organism                         | Strain number | PCR result** |
|----------------------------------|---------------|--------------|
| <i>B. cereus</i>                 | ATCC 10987    | negative     |
| <i>B. cereus</i>                 | 2998          | negative     |
| <i>B. cereus</i>                 | 3093          | negative     |
| <i>B. cereus</i>                 | LGL 3094      | negative     |
| <i>B. cereus</i>                 | ATCC 4342     | negative     |
| <i>B. cereus</i> bv. anthracis   | CI-1          | negative     |
| <i>B. cereus</i> bv. anthracis   | CA-1          | negative     |
| <i>B. cereus</i>                 | ATCC 33019    | negative     |
| <i>B. thuringiensis</i>          | ATCC 10792    | negative     |
| <i>B. thuringiensis</i>          | DSM 046       | negative     |
| <i>B. paranthracis</i>           | 2002          | negative     |
| <i>B. weihenstephanensis</i>     | B-0293        | negative     |
| <i>B. mycooides</i>              | B-298         | negative     |
| <i>B. subtilis</i>               | ATCC 6091     | negative     |
| <i>B. megaterium</i>             | ATCC 14581    | negative     |
| <i>Homo sapiens</i> ***          | n.a.*         | negative     |
| <i>Bos taurus</i> ***            | n.a.*         | negative     |
| <i>Capra aegagrus hircus</i> *** | n.a.*         | negative     |
| <i>Ovis gmelini aries</i> ***    | n.a.*         | negative     |
| <i>Equus caballus</i> ***        | n.a.*         | negative     |

\* not applicable (n.a.); \*\* results of n = 3 tests; \*\*\*typical host organisms.

Supplementary Table S12: Specificity panel – organisms relevant for differential diagnostics and other pathogens.

| Organism                                 | Strain number | PCR result* | Organism                            | Strain number  | PCR result* |
|------------------------------------------|---------------|-------------|-------------------------------------|----------------|-------------|
| <i>Brucella sp.</i>                      | F-070660      | negative    | <i>Moraxella catarrhalis</i>        | B-0433         | negative    |
| <i>Burkholderi mallei</i>                | L3-2962       | negative    | <i>Neisseria meningitidis</i>       | B-1332         | negative    |
| <i>Burkholderi pseudomallei</i>          | L3-0711       | negative    | <i>Propionibacterium acnes</i>      | B-0438         | negative    |
| <i>Burkholderia thailandensis</i>        | B-1668        | negative    | <i>Pseudomonas aeruginosa</i>       | B-0040         | negative    |
| <i>Campylobacter jejuni</i>              | B-1229        | negative    | <i>Serratia marcescens</i>          | B-0014         | negative    |
| <i>Candida albicans</i>                  | B-1266        | negative    | <i>Sphingomonas zeae</i>            | JM-791         | negative    |
| <i>Citrobacter freundii</i>              | B-0022        | negative    | <i>Staphylococcus aureus</i>        | B-0946         | negative    |
| <i>Clostridium paraperfringens</i>       | B-1435        | negative    | <i>Staphylococcus epidermidis</i>   | B-0026         | negative    |
| <i>Clostridium sporogenes</i>            | B-1450        | negative    | <i>Stenotrophomonas maltophilia</i> | B-0055         | negative    |
| <i>Eikenella corrodens</i>               | B-0614        | negative    | <i>Streptococcus pneumoniae</i>     | B-0847         | negative    |
| <i>Escherichia coli</i>                  | B-1324        | negative    | <i>Streptococcus pyogenes</i>       | B-0846         | negative    |
| <i>Francisella tularensis holarctica</i> | F-0049        | negative    | <i>Vibrio cholerae</i>              | B-1302         | negative    |
| <i>Haemophilus influenzae</i>            | B-0850        | negative    | <i>Yersinia enterocolitica</i>      | B-0099         | negative    |
| <i>Klebsiella pneumoniae</i>             | B-0008        | negative    | <i>Yersinia pestis</i>              | EV-76          | negative    |
| <i>Legionella pneumophila</i>            | B-1341        | negative    | Monkey Pox Virus                    | MSF-6          | negative    |
| <i>Listeria monocytogenes</i>            | DSM-12464     | negative    | Vaccinia Virus                      | VACV-0273/2004 | negative    |
|                                          |               |             | Varicella Zoster Virus              | none           | negative    |

\* results of n = 3 tests.

Supplementary Table S13: Linearity of the 16S rRNA SNP-PCR\*.

| [Template]**    | Assays day 1 |      |      | Assays day 2 |      |      | Assays day 3 |      |      | ( $\bar{O}$ ±SD)*** |
|-----------------|--------------|------|------|--------------|------|------|--------------|------|------|---------------------|
| <b>A.</b>       |              |      |      |              |      |      |              |      |      |                     |
| 10 <sup>9</sup> | 9.3          | 9.4  | 9.5  | 9.7          | 9.8  | 9.8  | 9.1          | 9.1  | 9.1  | 9.4±0.3             |
| 10 <sup>8</sup> | 12.6         | 12.6 | 12.5 | 13.0         | 13.1 | 13.0 | 12.3         | 12.3 | 12.3 | 12.6±0.3            |
| 10 <sup>7</sup> | 16.0         | 16.0 | 16.0 | 16.7         | 16.6 | 16.6 | 15.8         | 15.8 | 15.9 | 16.1±0.3            |
| 10 <sup>6</sup> | 19.2         | 19.1 | 19.0 | 19.5         | 19.6 | 19.6 | 18.8         | 18.8 | 18.8 | 19.2±0.3            |
| 10 <sup>5</sup> | 22.6         | 22.7 | 22.6 | 23.0         | 23.1 | 23.2 | 22.5         | 22.3 | 22.3 | 22.7±0.3            |
| 10 <sup>4</sup> | 25.9         | 25.8 | 26.0 | 26.2         | 26.3 | 26.3 | 25.6         | 25.6 | 25.6 | 25.9±0.3            |
| 10 <sup>3</sup> | 29.5         | 29.4 | 29.6 | 30.0         | 29.9 | 29.9 | 29.2         | 29.1 | 29.0 | 29.5±0.3            |
| 10 <sup>2</sup> | 32.3         | 32.9 | 32.3 | 32.9         | 33.0 | 32.8 | 32.4         | 32.2 | 32.0 | 32.5±0.3            |
| 10 <sup>1</sup> | 35.8         | 35.7 | 36.2 | 36.1         | 35.8 | 35.8 | 35.9         | 36.2 | 35.8 | 35.9±0.2            |
| 10 <sup>0</sup> | 36.9         | 37.3 | 38.8 | 39.2         | 38.9 | 38.6 | -            | 37.2 | -    | 38.1±1.0            |
| <b>B.</b>       |              |      |      |              |      |      |              |      |      |                     |
| 10 <sup>7</sup> | 17.1         | 17.0 | 17.1 | 16.7         | 16.8 | 16.8 | 16.8         | 16.8 | 16.8 | 16.9±0.2            |
| 10 <sup>6</sup> | 20.4         | 20.7 | 20.4 | 20.2         | 20.2 | 20.2 | 20.3         | 20.3 | 20.3 | 20.3±0.2            |
| 10 <sup>5</sup> | 24.0         | 24.0 | 24.1 | 23.8         | 23.7 | 23.7 | 23.8         | 23.7 | 23.9 | 23.9±0.2            |
| 10 <sup>3</sup> | 27.4         | 27.3 | 27.5 | 26.9         | 27.0 | 26.8 | 27.0         | 27.1 | 27.1 | 27.1±0.2            |
| 10 <sup>2</sup> | 30.8         | 29.6 | 30.7 | 30.5         | 30.5 | 30.6 | 30.5         | 30.7 | 30.4 | 30.5±0.3            |
| 10 <sup>1</sup> | 34.0         | 34.1 | 33.8 | 33.7         | 33.7 | 33.8 | 33.6         | 34.0 | 33.9 | 33.8±0.2            |
| 10 <sup>0</sup> | 38.3         | 36.7 | 37.1 | 36.1         | 36.9 | 36.7 | 37.3         | 37.1 | 36.6 | 37.0 ±0.6           |

\* Replicates (n=3) of each PCR reaction with target DNA were run on three consecutive days; \*\* templates at indicated concentration per reaction were cloned fragment (A) or *B. anthracis* Ames DNA (B); \*\*\* averages ( $\bar{O}$ ) ± standard deviations (SD) of n = 3 x 3 tests.

Supplementary Table S14: Probit-analysis of the 16S rRNA SNP-PCR.

| Copies/reaction | # of tests | # of positive tests |
|-----------------|------------|---------------------|
| 10              | 12         | 12                  |
| 8               | 12         | 12                  |
| 6               | 12         | 12                  |
| 4               | 12         | 12                  |
| 3               | 12         | 12                  |
| 2               | 12         | 7                   |
| 1               | 12         | 4                   |



Supplementary Table S15: Linearity of the 16S rRNA SNP RT-PCR\*.

| [Template]**    | Triplicates |      |      | ( $\bar{O}$ ±SD)*** |
|-----------------|-------------|------|------|---------------------|
| 10 <sup>8</sup> | 10.2        | 9.8  | 10.4 | 10.1±0.3            |
| 10 <sup>7</sup> | 13.7        | 13.7 | 13.8 | 13.7±0.1            |
| 10 <sup>6</sup> | 16.7        | 16.7 | 16.8 | 16.7±0.1            |
| 10 <sup>5</sup> | 20.0        | 19.5 | 21.2 | 20.2±0.9            |
| 10 <sup>4</sup> | 24.5        | 24.3 | 23.8 | 24.2±0.3            |
| 10 <sup>3</sup> | 26.6        | 26.9 | 26.6 | 26.7±0.2            |
| 10 <sup>2</sup> | 29.8        | 31.2 | 30.9 | 30.6±0.7            |
| 10 <sup>1</sup> | 34.7        | 35.0 | 34.9 | 34.8±0.2            |
| 10 <sup>0</sup> | 40.3        | 37.0 | 40.0 | 39.1±1.8            |

\* Replicates (n=3) of each PCR reaction with target DNA were run; \*\* templates at indicated concentration per reaction were RNAs (including genomic) DNA of *B. anthracis* Sterne; \*\*\* averages ( $\bar{O}$ ) ± standard deviations (SD) of n = 3 tests.

Supplementary Table S16: Probit-analysis of the 16S rRNA SNP RT-PCR.

| Copies/reaction | # of tests | # of positive tests |
|-----------------|------------|---------------------|
| 15              | 12         | 12                  |
| 12              | 12         | 12                  |
| 9               | 12         | 12                  |
| 7.5             | 12         | 12                  |
| 6               | 12         | 10                  |
| 4.5             | 12         | 10                  |
| 3               | 12         | 8                   |
| 1.5             | 12         | 8                   |
| 0               | 12         | 0                   |

## 6.2. Supplementary Figures

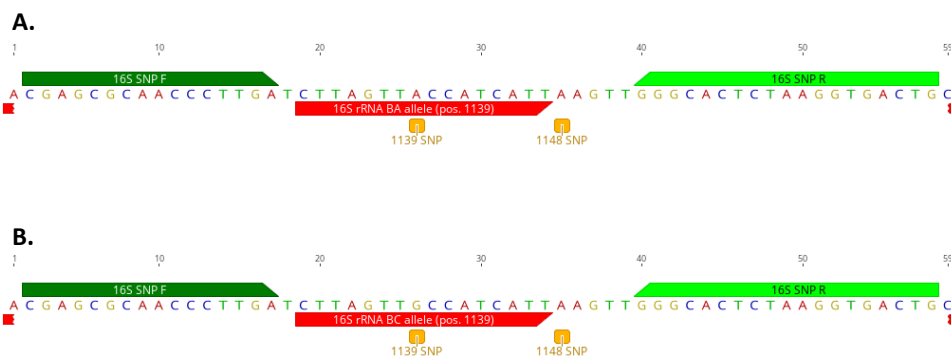

Supplementary Figure S1: Partial sequence of different alleles of the 16S rRNA genes of *B. anthracis* with specific SNP ("A" at position 1139 according to (3), position 1110 in *B. anthracis* Ames Ancestor NC\_007530)\* and primer and probe positions. (A) *B. anthracis*-specific 16S-BA-allele. (B) alternative 16S rRNA gene allele (16S-BC-allele) in *B. anthracis* common for the *B. cereus*-group with alternative SNP state ("G" at position 1110 in *B. anthracis* strain Ames Ancestor, NC\_007530). \*a second SNP at position 1119 present in some of the 16S rRNA gene alleles was found not to be specific for *B. anthracis* (3).

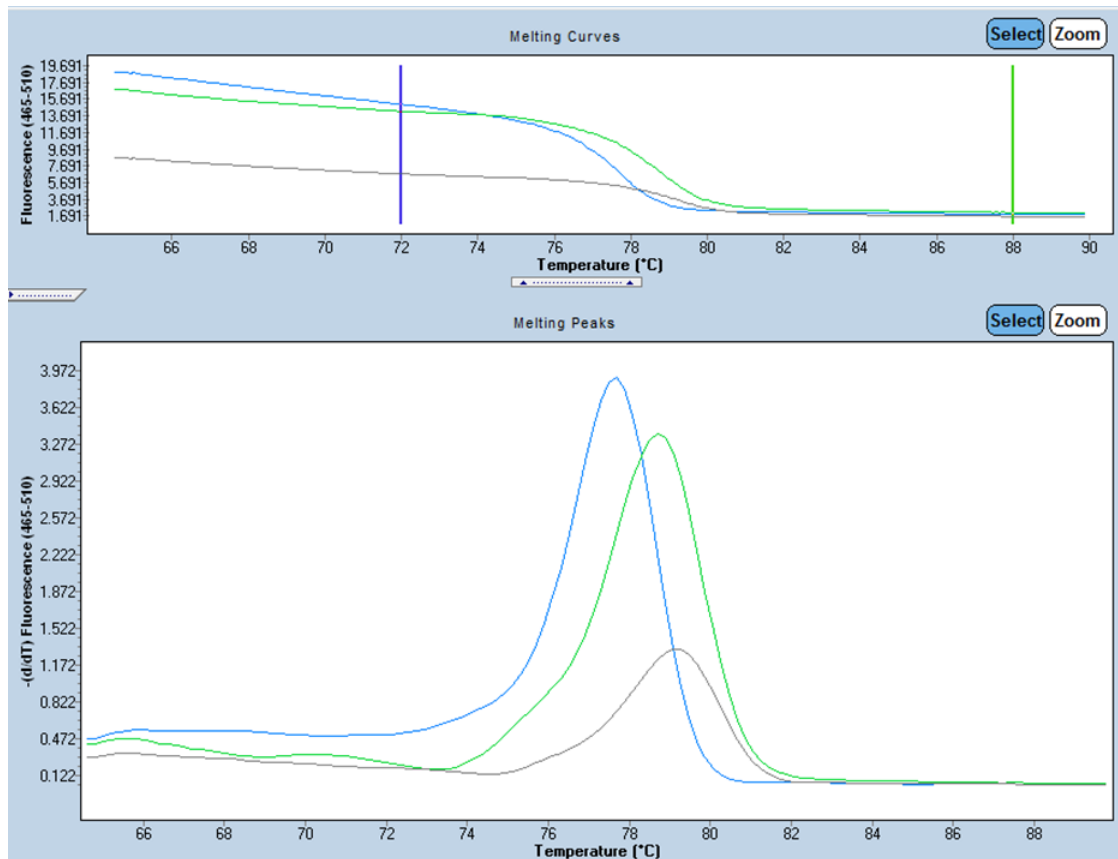

Supplementary Figure S2: Melting point analysis of PCR products. Shown are melting point analyses as fluorescence change (upper panel) or as its first derivative (lower panel) over a temperature gradient. Amplificates were 16S-BA-allele (100 template copies, blue line), 16S-BC-allele (100 template copies, green line) or water-only control (grey line).

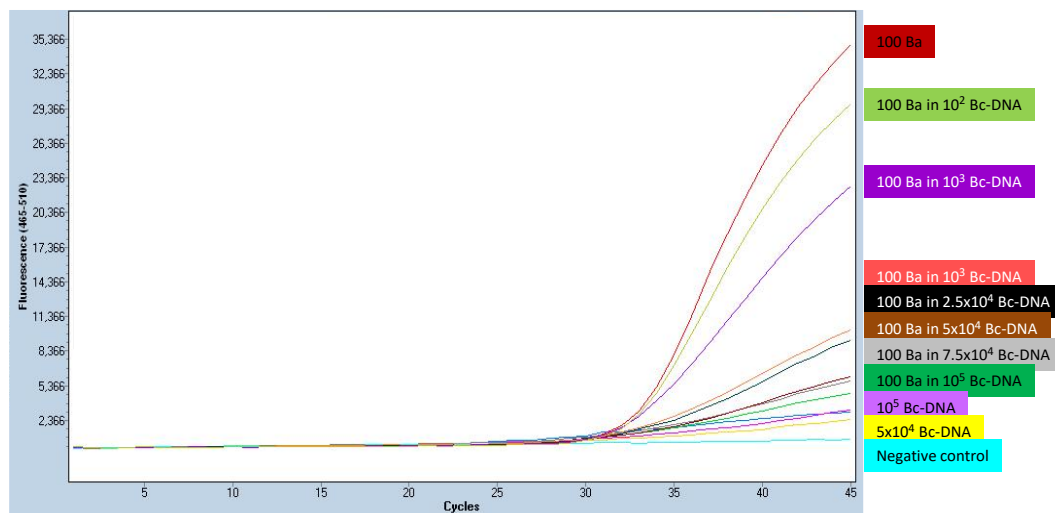

Supplementary Figure S3: Competitive inhibition the 16S rRNA SNP-PCR assay by the alternative 16S-BC-allele. A constant 100 template copies of the 16S-BA-allele per reaction were titrated against increasing copy numbers of the alternative 16S-BC-allele and fluorescence recorded (shown are representative curves; see Supplementary Table S9 for numerical data as replicates).

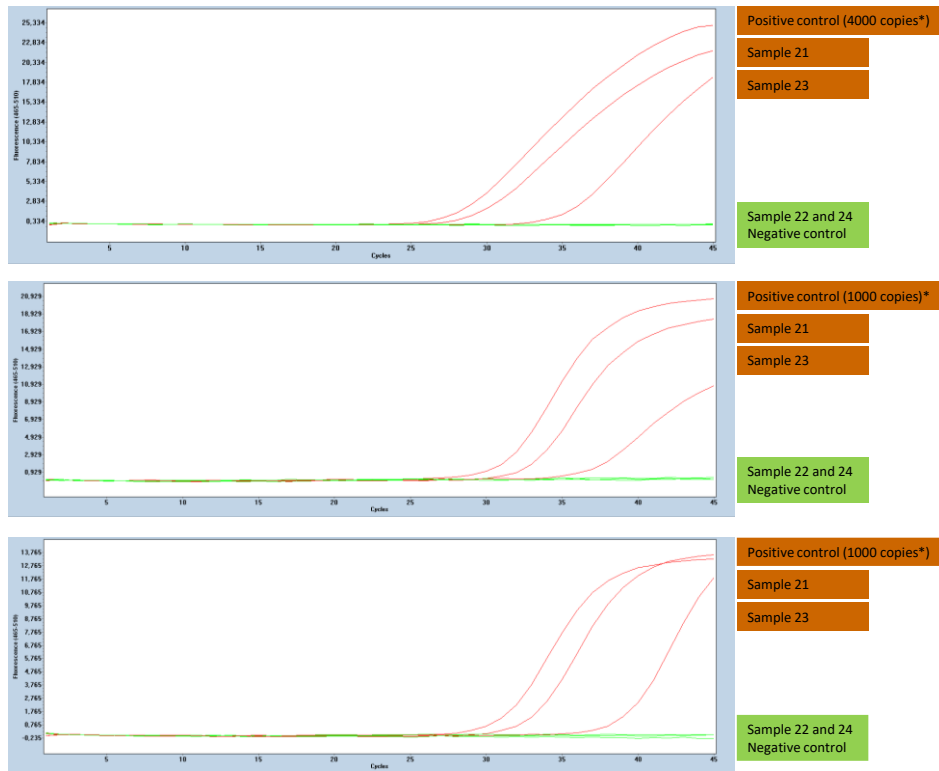

Supplementary Figure S4: Challenge of the new 16S rRNA-based multi-copy assay with samples from a ring trial. Samples were subjected to real time PCR using the new 16S rRNA SNP assay (upper panel), published *dhp61* gene assay (4) (middle panel) or published *PL3* gene assay (5) (lower panel). Representative amplification curves (from n=3 with similar results) are shown. \*Positive controls were 1000 genomes of *B. anthracis* Ames (harboring 4000 copies of the 16S-BA-allele but only 1000 copies of *dhp61* or *PL3*, respectively).

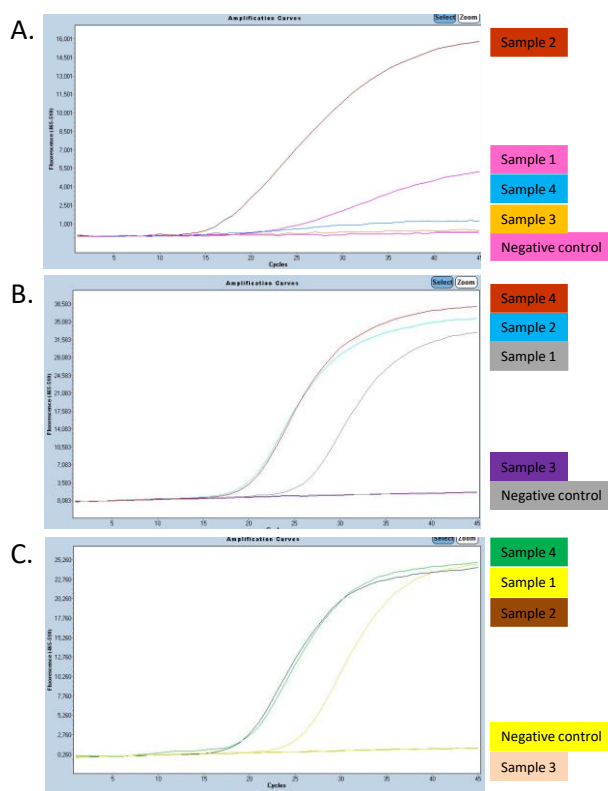

Supplementary Figure S5: Challenge of the new 16S rRNA-based multi-copy assay with total DNA from spiked soil. Samples were subjected to real time PCR using the new 16S rRNA SNP assay (upper panel), published *dhp61* gene assay (4) (middle panel) or published *PL3* gene assay (5) (lower panel). Representative amplification curves (from n=3 with similar results) are shown.

## References

1. Sahl JW, Pearson T, Okinaka R, Schupp JM, Gillice JD, Heaton H, Birdsell D, Hepp C, Fofanov V, Noseda R, Fasanella A, Hoffmaster A, Wagner DM, Keim P. 2016. A *Bacillus anthracis* genome sequence from the Sverdlovsk 1979 autopsy specimens. *MBio* 7:e01501-16.
2. Antwerpen M, Beyer W, Bassy O, Ortega-García MV, Cabria-Ramos JC, Grass G, Wölfel R. 2019. Phylogenetic placement of isolates within the Trans-Eurasian clade A.Br.008/009 of *Bacillus anthracis*. *Microorganisms* 7:689.
3. Hakovirta JR, Prezioso S, Hodge D, Pillai SP, Weigel LM. 2016. Identification and analysis of informative single nucleotide polymorphisms in 16S rRNA gene sequences of the *Bacillus cereus* group. *J Clin Microbiol* doi:JCM.01267-16 [pii] 10.1128/JCM.01267-16.
4. Antwerpen MH, Zimmermann P, Bewley K, Frangoulidis D, Meyer H. 2008. Real-time PCR system targeting a chromosomal marker specific for *Bacillus anthracis*. *Mol Cell Probes* 22:313-5.
5. Wielinga PR, Hamidjaja RA, Agren J, Knutsson R, Segerman B, Fricker M, Ehling-Schulz M, de Groot A, Burton J, Brooks T, Janse I, van Rotterdam B. 2011. A multiplex real-time PCR for identifying and differentiating *B. anthracis* virulent types. *Int J Food Microbiol* 145 Suppl 1:S137-44.
